# Supplementary material for: Intermetallic transfer of unsymmetrical borylene fragments: isolation of the second early-transition-metal terminal borylene complex and other rare species
Source: Royal Society of Chemistry journal article supplement (doi:10.1039/d0dt03557b), 2020-01-01
Supplement: d0dt03557b1.pdf [file d0dt03557b1.pdf]

**Supporting Information for:**

**Intermetallic transfer of unsymmetrical borylene fragments: isolation of the second early-transition-metal terminal borylene complex and other rare species**

Bret Macha,<sup>a,b</sup> Debabrata Dhara,<sup>a,b</sup> Krzysztof Radacki,<sup>a,b</sup> Rian D. Dewhurst,<sup>a,b</sup> and Holger Braunschweig<sup>\*,a,b</sup>

<sup>a</sup> Institute for Inorganic Chemistry, Julius-Maximilians-Universität Würzburg, Am Hubland, 97074 Würzburg (Germany)

<sup>b</sup> Institute for Sustainable Chemistry & Catalysis with Boron, Julius-Maximilians-Universität Würzburg, Am Hubland, 97074 Würzburg (Germany)

|                                        |    |
|----------------------------------------|----|
| 1. Contents                            | 1  |
| 2. Synthetic and Spectroscopic Details | 2  |
| 3. Crystal Structure Determination     | 9  |
| 4. References                          | 24 |

## Synthetic and Spectroscopic Details

**General considerations.** All manipulations were performed either under an atmosphere of dry argon or *in vacuo* using standard Schlenk line or glovebox techniques. Pentane and hexane were dried and degassed by refluxing over Na/K amalgam under an atmosphere of dry argon. Diethyl ether (Et<sub>2</sub>O) and tetrahydrofuran (THF) were dried and degassed by refluxing over Na/benzophenone complex and K/benzophenone complex (ketyl), respectively, under an atmosphere of dry argon. Toluene and benzene were dried and degassed by refluxing over molten sodium and potassium, respectively, under an atmosphere of dry argon. Hexamethyldisiloxane (C<sub>6</sub>H<sub>18</sub>OSi<sub>2</sub>) was dried over molecular sieves (4 Å) and degassed by three freeze-pump-thaw cycles before use. [(OC)<sub>5</sub>Cr(NMe<sub>3</sub>)], [(OC)<sub>5</sub>W(NMe<sub>3</sub>)], [(OC)<sub>5</sub>Mo(NMe<sub>3</sub>)], Na<sub>2</sub>[Mo(CO)<sub>5</sub>], Na<sub>2</sub>[Cr(CO)<sub>5</sub>], Na<sub>2</sub>[W(CO)<sub>5</sub>],<sup>1</sup> [(η<sup>5</sup>-C<sub>5</sub>H<sub>5</sub>)V(CO)<sub>4</sub>], [(η<sup>5</sup>-C<sub>5</sub>H<sub>5</sub>)<sub>2</sub>Ni<sub>2</sub>(CO)<sub>2</sub>],<sup>2</sup> [(η<sup>5</sup>-C<sub>5</sub>H<sub>4</sub>Me)Co(CO)<sub>2</sub>],<sup>3</sup> [(η<sup>5</sup>-C<sub>5</sub>Me<sub>5</sub>)Ir(CO)<sub>2</sub>],<sup>4</sup> HN(SiMe<sub>3</sub>)(*t*Bu)<sup>5</sup> were synthesised by standard literature procedures. Deuterated benzene (C<sub>6</sub>D<sub>6</sub>) was dried and degassed by refluxing over LiAlH<sub>4</sub> under an atmosphere of dry argon. All dried solvents (both deuterated and non-deuterated) were stored under argon over activated molecular sieves. Photolytic experiments were performed in quartz Schlenk flasks or J. Young tubes. The light source was a LOT-Oriel photolysis apparatus with a 500 W Hg/Xe arc lamp equipped with infrared filters, irradiating at 210-600 nm. NMR spectra of isolated compounds were either acquired on a Bruker Avance 500 NMR spectrometer or a Bruker Avance 400 NMR spectrometer. Chemical shifts (δ) are given in ppm. <sup>1</sup>H and <sup>13</sup>C{<sup>1</sup>H} NMR spectra were referenced to external SiMe<sub>4</sub> by residual protic solvent (<sup>1</sup>H) or the solvent itself (<sup>13</sup>C). <sup>11</sup>B{<sup>1</sup>H} and <sup>10</sup>B{<sup>1</sup>H} NMR spectra were referenced to external BF<sub>3</sub>.OEt<sub>2</sub>. <sup>29</sup>Si{<sup>1</sup>H} NMR spectra were referenced to external SiMe<sub>4</sub>. IR data were acquired on a JASCO FT/IR-6200typeA apparatus. UV-vis spectra were acquired on a JASCO-V660 UV-vis spectrometer. Differential thermoanalysis (DTA) were performed on an Elementar Vario MICRO cube elemental analyser.

**Synthesis of Br<sub>2</sub>BN(SiMe<sub>3</sub>)(*t*Bu).** A solution of HN(SiMe<sub>3</sub>)(*t*Bu) (20.0 g, 138 mmol) in hexane (50 mL) was treated with *n*BuLi (1.6 M in hexane, 86 mL, 140 mmol) at 0 °C for a period of 3 h. After the 3 h period, the reaction was allowed to warm to room temperature and stir for a period of 21 h. BBr<sub>3</sub> (13.1 mL, 34.6 g, 138 mmol) was then added dropwise to the reaction mixture over the course of 3 h with stirring for an additional period of 24 h at room temperature. Workup of this reaction mixture was undertaken by filtration of the solids and removal of all volatiles from the filtrate under high vacuum (0.001 Torr). The residual oil was distilled under high vacuum (0.001 Torr) at 43 °C to yield Br<sub>2</sub>BN(SiMe<sub>3</sub>)(*t*Bu) (27.8 g, 88.3 mmol) as a clear colorless oil in 64% yield. <sup>1</sup>H NMR (500.13 MHz, CDCl<sub>3</sub>, 297 K) [ppm]: δ = 1.49 (s, 9H, C-(CH<sub>3</sub>)<sub>3</sub>), 0.41 (s, 9H, Si-(CH<sub>3</sub>)<sub>3</sub>), <sup>2</sup>J<sub>H-Si</sub> = 6.6 Hz). <sup>13</sup>C{<sup>1</sup>H} NMR

(125.77 MHz, CDCl<sub>3</sub>, 297 K) [ppm]:  $\delta$  = 57.6 (s, 1C, C-(CH<sub>3</sub>)<sub>3</sub>), 32.7 (s, 3C, C-(CH<sub>3</sub>)<sub>3</sub>), 5.8 (s, 3C, Si-(CH<sub>3</sub>)<sub>3</sub>, <sup>1</sup>J<sub>C-Si</sub> = 58 Hz). <sup>11</sup>B{<sup>1</sup>H} NMR (160.47 MHz, CDCl<sub>3</sub>, BF<sub>3</sub>.OEt<sub>2</sub>, 297 K) [ppm]:  $\delta$  = 36.4 (s). <sup>29</sup>Si{<sup>1</sup>H} NMR (79.49 MHz, CDCl<sub>3</sub>, SiMe<sub>4</sub>, 297 K) [ppm]:  $\delta$  = 7.8 (s).

**Synthesis of [(OC)<sub>5</sub>Cr{BN(SiMe<sub>3</sub>)(tBu)}] (1a).** A solution of [(OC)<sub>5</sub>Cr(NMe<sub>3</sub>)] (1.03 g, 4.10 mmol) in THF (5 mL) was cooled to -78 °C and a solution of Na[C<sub>10</sub>H<sub>8</sub>] (41 mL, 0.20 M in THF) was added dropwise over a period of 10 min. After the addition was completed, all volatile materials were removed under high vacuum (0 °C/0.001 Torr) and the remaining brown/yellow solids were dissolved with Et<sub>2</sub>O (20 mL) and triturated in an ultrasonic bath for 2 min to extract the remaining naphthalene from the crude material. The reaction mixture was separated by centrifugation to concentrate Na<sub>2</sub>[Cr(CO)<sub>5</sub>] as a yellow solid with a Et<sub>2</sub>O supernatant. The supernatant was subsequently decanted and the process repeated two additional times (2 x 20 mL Et<sub>2</sub>O) in order to remove residual naphthalene. The remaining solid precipitate was dried briefly to yield Na<sub>2</sub>[Cr(CO)<sub>5</sub>] as a light brown/yellow powder. This powder was then suspended in toluene and cooled to -78 °C, after which Br<sub>2</sub>BN(SiMe<sub>3</sub>)(tBu) (1.3 g, 4.1 mmol) was added dropwise by syringe. The reaction mixture was then stirred at -78 °C for one hour after which the color of the reaction mixture changed from light yellow to dark brown. The reaction flask was removed from the cold bath and allowed to stir for an additional hour while slowly warming to room temperature. Over the course of this additional hour the reaction changed to a completely opaque black suspension. All volatiles were then removed under high vacuum (0.001 Torr) and the black solid was dissolved in pentane (20 mL). This pentane suspension was triturated in an ultrasonic bath for a period of 2 min and separated by centrifugation to concentrate the salt elimination byproduct from a black pentane supernatant. Filtration of the supernatant yielded a black pentane filtrate, which precipitated colorless crystalline solids upon storage at -78 °C after a period of 24 h. These colorless crystalline solids correspond to a crude sample of [(OC)<sub>5</sub>Cr{BN(SiMe<sub>3</sub>)(tBu)}], which could be further purified by redissolving the crude material in pentane and storage in a -78 °C freezer for an additional period of 24 h. Removal of the supernatant from the subsequent crystalline material and drying of the product under high vacuum yielded analytically pure [(OC)<sub>5</sub>Cr{BN(SiMe<sub>3</sub>)(tBu)}] (0.555 g, 1.60 mmol) in 39% yield. Crystals suitable for X-ray diffraction were grown from saturated solutions of [(OC)<sub>5</sub>Cr{BN(SiMe<sub>3</sub>)(tBu)}] in hexane. <sup>1</sup>H NMR (500.13 MHz, C<sub>6</sub>D<sub>6</sub>, 297 K) [ppm]:  $\delta$  = 1.15 (s, 9H, C-(CH<sub>3</sub>)<sub>3</sub>), 0.16 (s, 9H, Si-(CH<sub>3</sub>)<sub>3</sub>, <sup>1</sup>J<sub>H-Si</sub> = 6.7 Hz). <sup>13</sup>C{<sup>1</sup>H} NMR (125.77 MHz, C<sub>6</sub>D<sub>6</sub>, 297 K) [ppm]:  $\delta$  = 218.4 (s, 1C, *trans*-CO to B), 217.9 (s, 4C, *cis*-CO to B), 58.4 (s, 1C, C-(CH<sub>3</sub>)<sub>3</sub>), 33.6 (s, 3C, C-(CH<sub>3</sub>)<sub>3</sub>), 3.3 (s, 3C, Si-(CH<sub>3</sub>)<sub>3</sub>). <sup>13</sup>C{<sup>1</sup>H}-DEPT135 NMR (125.77 MHz, C<sub>6</sub>D<sub>6</sub>, 297 K) [ppm]:  $\delta$  = 33.6 (s, 3C, C-(CH<sub>3</sub>)<sub>3</sub>), 3.3 (s, 3C, Si-(CH<sub>3</sub>)<sub>3</sub>). <sup>11</sup>B{<sup>1</sup>H} NMR (160.47 MHz, C<sub>6</sub>D<sub>6</sub>, BF<sub>3</sub>.OEt<sub>2</sub>, 297 K) [ppm]:  $\delta$  = 97.0 (br s). <sup>29</sup>Si{<sup>1</sup>H} NMR (79.49 MHz, C<sub>6</sub>D<sub>6</sub>, SiMe<sub>4</sub>, 297 K) [ppm]:  $\delta$  = 3.4 (s). IR (solid)

[ $\text{cm}^{-1}$ ]:  $\nu = 3255, 2981, 2058, 1969, 1900, 1383, 1255, 1171$ . **EA** [%]: calculated for  $\text{C}_{12}\text{H}_{18}\text{BCrNO}_5\text{Si}$ : C 41.52, H 5.23, N 4.03; found: C 41.58, H 5.25, N 3.93. **DTA** [ $^{\circ}\text{C}$ ]: mp = 60, decomp.  $\geq 211$ .

**Synthesis of  $[(\text{OC})_5\text{Mo}\{\text{BN}(\text{SiMe}_3)(t\text{Bu})\}]$  (**1b**).** A solution of  $[(\text{OC})_5\text{Mo}(\text{NMe}_3)]$  (0.93 g, 3.2 mmol) in THF (5 mL) was cooled to  $-78\text{ }^{\circ}\text{C}$  and a solution of  $\text{Na}[\text{C}_{10}\text{H}_8]$  (32 mL, 0.20 M in THF) was added dropwise over a period of 10 min. After the addition was completed, all volatile materials were removed under high vacuum ( $0\text{ }^{\circ}\text{C}/0.001\text{ Torr}$ ) and the remaining brown/yellow solids were dissolved in  $\text{Et}_2\text{O}$  (20 mL) and triturated in an ultrasonic bath for 2 min to extract the remaining naphthalene from the crude material. The reaction mixture was separated by centrifugation to concentrate  $\text{Na}_2[\text{Mo}(\text{CO})_5]$  as a yellow solid with a  $\text{Et}_2\text{O}$  supernatant. The supernatant was subsequently decanted and the process repeated two additional times (2 x 20 mL  $\text{Et}_2\text{O}$ ) in order to remove residual naphthalene. The remaining solid precipitate was dried briefly to yield  $\text{Na}_2[\text{Mo}(\text{CO})_5]$  as a light brown/yellow powder. This powder was suspended in toluene and cooled to  $-78\text{ }^{\circ}\text{C}$  after which  $\text{Br}_2\text{BN}(\text{SiMe}_3)(t\text{Bu})$  (1.00 g, 3.17 mmol) was added dropwise by syringe. The reaction mixture was stirred at  $-78\text{ }^{\circ}\text{C}$  for one hour after which the color of the reaction mixture changed from light yellow to dark brown. The reaction flask was subsequently removed from the cold bath and allowed to stir for an additional hour while slowly warming to room temperature. Over the course of this additional hour the reaction mixture changed to a completely opaque black suspension. All volatiles were then removed under high vacuum and the black solids were dissolved in pentane (20 mL). This pentane suspension was triturated in an ultrasonic bath for a period of 2 min and separated by centrifugation to concentrate the salt elimination byproduct from a black pentane supernatant. Filtration of the supernatant yielded a black pentane fraction, which precipitated colorless crystalline solids upon storage in the  $-78\text{ }^{\circ}\text{C}$  freezer after a period of 24 h. These colorless crystalline solids correspond to a crude sample of  $[(\text{OC})_5\text{Mo}\{\text{BN}(\text{SiMe}_3)(t\text{Bu})\}]$ , which could be further purified by redissolving the crude material in pentane and storage at  $-78\text{ }^{\circ}\text{C}$  for an additional period of 24 h. Removal of the supernatant from the subsequent crystalline material and drying of the product under high vacuum yielded analytically pure  $[(\text{OC})_5\text{Mo}\{\text{BN}(\text{SiMe}_3)(t\text{Bu})\}]$  (0.080 g, 0.21 mmol) in  $<10\%$  yield. Crystals suitable for X-ray diffraction were grown from saturated solutions of  $[(\text{OC})_5\text{Mo}\{\text{BN}(\text{SiMe}_3)(t\text{Bu})\}]$  in hexane.  **$^1\text{H}$  NMR** (500.13 MHz,  $\text{C}_6\text{D}_6$ , 297 K) [ppm]:  $\delta = 1.14$  (s, 9H, C- $(\text{CH}_3)_3$ ), 0.14 (s, 9H, Si- $(\text{CH}_3)_3$ ,  $^2J_{\text{H-Si}} = 6.6\text{ Hz}$ ).  **$^{13}\text{C}\{^1\text{H}\}$  NMR** (125.77 MHz,  $\text{C}_6\text{D}_6$ , 297 K) [ppm]:  $\delta = 207.5$  (s, 4C, *cis*-CO to B), 206.9 (s, 1C, *trans*-CO to B), 58.3 (s, 1C, C- $(\text{CH}_3)_3$ ), 33.9 (s, 3C, C- $(\text{CH}_3)_3$ ), 3.5 (s, 3C, Si- $(\text{CH}_3)_3$ ).  **$^{13}\text{C}\{^1\text{H}\}$ -DEPT135 NMR** (125.77 MHz,  $\text{C}_6\text{D}_6$ , 297 K) [ppm]:  $\delta = 33.9$  (s, 3C, C- $(\text{CH}_3)_3$ ), 3.5 (s, 3C, Si- $(\text{CH}_3)_3$ ).  **$^{11}\text{B}\{^1\text{H}\}$  NMR** (160.47 MHz,  $\text{C}_6\text{D}_6$ ,  $\text{BF}_3\cdot\text{OEt}_2$ , 297 K) [ppm]:  $\delta = 95.7$  (br s).  **$^{29}\text{Si}\{^1\text{H}\}$  NMR** (79.49 MHz,  $\text{C}_6\text{D}_6$ ,  $\text{SiMe}_4$ , 297 K) [ppm]:  $\delta$

= 3.4 (s). IR (solid) [cm<sup>-1</sup>]:  $\nu$  = 2981, 2065, 1896, 1383, 1254, 1171. EA [%]: calculated for C<sub>12</sub>H<sub>18</sub>BMoNO<sub>5</sub>Si: C 36.85, H 4.64, N 3.58; found: C 36.98, H 4.64, N 3.62. DTA [°C]: decomp.  $\geq$  r.t.

**Synthesis of [(OC)<sub>5</sub>W{BN(SiMe<sub>3</sub>)(tBu)}] (1c).** A solution of [(OC)<sub>5</sub>W(NMe<sub>3</sub>)] [(OC)<sub>5</sub>Mo(NMe<sub>3</sub>)] (0.67 g, 1.8 mmol) in THF (5 mL) was cooled to -78 °C and a solution of Na[C<sub>10</sub>H<sub>8</sub>] (18 mL, 0.20 M in THF) was added dropwise over a period of 10 min. After the addition was completed, all volatile materials were removed under high vacuum (0 °C/0.001 Torr) and the remaining brown/yellow solids were dissolved in Et<sub>2</sub>O (20 mL) and triturated in an ultrasonic bath for a period of 2 min to extract the remaining naphthalene from the crude material. The reaction mixture was separated by centrifugation to concentrate Na<sub>2</sub>[W(CO)<sub>5</sub>] as a yellow solid with an Et<sub>2</sub>O supernatant. The supernatant was subsequently decanted and the process repeated two additional times (2 x 20 mL Et<sub>2</sub>O) to remove residual naphthalene. The remaining solid precipitate was dried briefly to yield Na<sub>2</sub>[W(CO)<sub>5</sub>] as a light brown/yellow powder. This powder was suspended in toluene and cooled to -78 °C after which Br<sub>2</sub>BN(SiMe<sub>3</sub>)(tBu) (0.59 g, 1.9 mmol) was added dropwise by syringe. The reaction mixture was then stirred at -78 °C for one hour after which the color of the reaction mixture was witnessed to change from light yellow to dark brown. The reaction flask was removed from the cold bath and allowed to stir for an additional hour while slowly warming to room temperature. Over the course of this additional hour the reaction mixture changed to a completely opaque black suspension. All volatiles were then removed under high vacuum and the black solids were dissolved in pentane (20 mL). This pentane suspension was triturated in an ultrasonic bath for 2 min and separated by centrifugation to concentrate the salt elimination byproduct from a black pentane supernatant. Filtration of the supernatant yielded a black pentane fraction, which precipitated colorless crystalline solids upon storage at -78 °C after a period of 24 h. These colorless crystalline solids correspond to a crude fraction of [(OC)<sub>5</sub>W{BN(SiMe<sub>3</sub>)(tBu)}], which could be further purified by redissolving the crude material in pentane and storage in a -78 °C freezer for an additional 24 h. Removal of the supernatant from the subsequent crystalline material and drying of the product under high vacuum yielded analytically pure [(OC)<sub>5</sub>W{BN(SiMe<sub>3</sub>)(tBu)}] (0.293 g, 0.612 mmol) in 35% yield. Crystals suitable for X-ray diffraction were grown from saturated solutions of [(OC)<sub>5</sub>W{BN(SiMe<sub>3</sub>)(tBu)}] in hexane. <sup>1</sup>H NMR (500.13 MHz, C<sub>6</sub>D<sub>6</sub>, 297 K) [ppm]:  $\delta$  = 1.14 (s, 9H, C-(CH<sub>3</sub>)<sub>3</sub>), 0.15 (s, 9H, Si-(CH<sub>3</sub>)<sub>3</sub>, <sup>2</sup>J<sub>H-Si</sub> = 6.8 Hz). <sup>13</sup>C{<sup>1</sup>H} NMR (125.77 MHz, C<sub>6</sub>D<sub>6</sub>, 297 K) [ppm]:  $\delta$  = 197.7 (s, 4C, *cis*-CO to B, <sup>1</sup>J<sub>C-W</sub> = 121 Hz), 191.2 (s, 1C, *trans*-CO to B, <sup>1</sup>J<sub>C-W</sub> = 126 Hz), 58.0 (s, 1C, C-(CH<sub>3</sub>)<sub>3</sub>), 34.0 (s, 3C, C-(CH<sub>3</sub>)<sub>3</sub>), 3.5 (s, 3C, Si-(CH<sub>3</sub>)<sub>3</sub>). <sup>13</sup>C{<sup>1</sup>H}-DEPT135 NMR (125.77 MHz, C<sub>6</sub>D<sub>6</sub>, 297 K) [ppm]:  $\delta$  = 34.0 (s, 3C, C-(CH<sub>3</sub>)<sub>3</sub>), 3.50 (s, 3C, Si-(CH<sub>3</sub>)<sub>3</sub>). <sup>11</sup>B{<sup>1</sup>H} NMR (160.47 MHz, C<sub>6</sub>D<sub>6</sub>, BF<sub>3</sub>.OEt<sub>2</sub>, 297 K) [ppm]:  $\delta$  = 91.7 (br s). <sup>29</sup>Si{<sup>1</sup>H} NMR (79.49 MHz, C<sub>6</sub>D<sub>6</sub>, SiMe<sub>4</sub>, 297 K) [ppm]:  $\delta$  = 2.5 (s). IR (solid) [cm<sup>-1</sup>]:  $\nu$  = 3735, 3053, 2985, 2065, 1898, 1441, 1369, 1254, 1167. EA [%]:

calculated for  $C_{12}H_{18}BWO_5Si$ : C 30.09, H 3.79, N 2.92; found: C 29.72, H 3.46, N 2.79. **DTA** [ $^{\circ}C$ ]: mp = 73, endo. = 150, decomp.  $\geq$  233.

**Synthesis of  $[(\eta^5-C_5H_5)(OC)_3V\{BN(SiMe_3)(tBu)\}]$  (2).** A solution of  $[(OC)_5W\{BN(SiMe_3)(tBu)\}]$  (45 mg, 0.096 mmol) and  $[(\eta^5-C_5H_5)V(CO)_4]$  (23 mg, 0.10 mmol) in benzene was irradiated with a high-pressure Hg lamp at room temperature for approximately 14 h. After completion of the reaction was ascertained *via* monitoring by  $^{11}B\{^1H\}$  NMR spectroscopy, all volatiles were removed under high vacuum (0.001 Torr). The resulting solid material was redissolved in hexamethyldisiloxane and filtered through a column (0.5 x 2.0 cm) of pacified silica gel.<sup>6</sup> Storage of this filtered solution at  $-30^{\circ}C$  for a week yielded  $[(\eta^5-C_5H_5)(OC)_3V\{BN(SiMe_3)(tBu)\}]$  as an orange crystalline solid. The supernatant was subsequently decanted and the crystalline material dried under vacuum to give  $[(\eta^5-C_5H_5)(OC)_3V\{BN(SiMe_3)(tBu)\}]$  (29 mg, 0.081 mmol) in 84% yield. Crystals suitable for X-ray diffraction were grown from saturated solutions of  $[(\eta^5-C_5H_5)(OC)_3V\{BN(SiMe_3)(tBu)\}]$  in hexane.  **$^1H$  NMR** (500.13 MHz,  $C_6D_6$ , 297 K) [ppm]:  $\delta$  = 4.64 (s, 5H,  $\eta^5-C_5H_5$ ), 1.37 (s, 9H, C-( $CH_3$ )<sub>3</sub>), 0.26 (s, 9H, Si-( $CH_3$ )<sub>3</sub>),  $^2J_{H-Si}$  = 6.7 Hz).  **$^{13}C\{^1H\}$  NMR** (125.77 MHz,  $C_6D_6$ , 297 K) [ppm]:  $\delta$  = 197.7 (s, 3C, C-O), 91.3 (s, 5C,  $\eta^5-C_5H_5$ ), 57.8 (s, 1C, C-( $CH_3$ )<sub>3</sub>), 33.1 (s, 3C, C-( $CH_3$ )<sub>3</sub>), 2.8 (s, 3C, Si-( $CH_3$ )<sub>3</sub>),  $^1J_{C-Si}$  = 58 Hz).  **$^{13}C\{^1H\}$ -DEPT135 NMR** (125.77 MHz,  $C_6D_6$ , 297 K) [ppm]:  $\delta$  = 91.3 (s, 5C,  $\eta^5-C_5H_5$ ), 33.1 (s, 3C, C-( $CH_3$ )<sub>3</sub>), 2.8 (s, 3C, Si-( $CH_3$ )<sub>3</sub>).  **$^{11}B\{^1H\}$  NMR** (160.47 MHz,  $C_6D_6$ ,  $BF_3 \cdot OEt_2$ , 297 K) [ppm]:  $\delta$  = 100.3 (br s).  **$^{29}Si\{^1H\}$  NMR** (79.49 MHz,  $C_6D_6$ ,  $SiMe_4$ , 297 K) [ppm]:  $\delta$  = 3.6 (s). **EA** [%]: calculated for  $C_{15}H_{23}BNO_3SiV$ : C 50.72, H 6.53, N 3.94; found: C 46.98, H 6.30, N 3.40. **DTA** [ $^{\circ}C$ ]: mp = 74, decomp.  $\geq$  259.

**Synthesis of  $\{[(\eta^5-C_5H_5)Ni]_2(\mu-CO)\{\mu-BN(SiMe_3)(tBu)\}\}$  (3).** A solution of  $[(\eta^5-C_5H_5)_2Ni_2(CO)_2]$  (16 mg, 0.054 mmol) and  $[(OC)_5W\{BN(SiMe_3)(tBu)\}]$  (27 mg, 0.056 mmol) in hexane (2 mL) was irradiated with a high-pressure Hg lamp at room temperature for approximately 7 h. After completion of the reaction was ascertained *via* monitoring by  $^{11}B\{^1H\}$  NMR spectroscopy, all volatiles were removed under high vacuum (0.001 Torr). The resulting solid material was redissolved in hexamethyldisiloxane and filtered through a column (0.5 x 2.0 cm) of pacified silica gel.<sup>6</sup> Storage of this filtered solution at  $-30^{\circ}C$  for a week yielded  $\{[(\eta^5-C_5H_5)Ni]_2(\mu-CO)\{\mu-BN(SiMe_3)(tBu)\}\}$  as a dark red crystalline solid. The supernatant was subsequently decanted and the crystalline material dried under vacuum to give  $\{[(\eta^5-C_5H_4Me)Co]_2(\mu-CO)\{\mu-BN(SiMe_3)(tBu)\}\}$  (17 mg, 0.040 mmol) in 74% yield. Crystals suitable for X-ray diffraction were grown from saturated solutions of  $\{[(\eta^5-C_5H_5)Ni]_2(\mu-CO)\{\mu-BN(SiMe_3)(tBu)\}\}$  in hexane.  **$^1H$  NMR** (500.13 MHz,  $C_6D_6$ , 297 K) [ppm]:  $\delta$  = 5.32 (s, 10H,  $\eta^5-C_5H_5$ ), 1.18 (s, 9H, C-( $CH_3$ )<sub>3</sub>), 0.24 (s, 9H, Si-( $CH_3$ )<sub>3</sub>),  $^2J_{H-Si}$  = 6.6 Hz).  **$^{13}C\{^1H\}$  NMR** (125.77 MHz,  $C_6D_6$ , 297 K) [ppm]:  $\delta$  = 92.5 (s, 10C,  $\eta^5-C_5H_5$ ), 56.9 (s, 1C, C-( $CH_3$ )<sub>3</sub>), 33.2 (s, 3C, C-( $CH_3$ )<sub>3</sub>), 4.0 (s, 3C, Si-( $CH_3$ )<sub>3</sub>),  $^1J_{C-Si}$  = 57 Hz).  **$^{13}C\{^1H\}$**

**DEPT135 NMR** (125.77 MHz, C<sub>6</sub>D<sub>6</sub>, 297 K) [ppm]:  $\delta$  = 92.5 (s, 10C,  $\eta^5$ -C<sub>5</sub>H<sub>5</sub>), 33.2 (s, 3C, C-(CH<sub>3</sub>)<sub>3</sub>), 4.0 (s, 3C, Si-(CH<sub>3</sub>)<sub>3</sub>). **<sup>11</sup>B{<sup>1</sup>H} NMR** (160.47 MHz, C<sub>6</sub>D<sub>6</sub>, BF<sub>3</sub>.OEt<sub>2</sub>, 297 K) [ppm]:  $\delta$  = 94.1 (br s). **<sup>29</sup>Si{<sup>1</sup>H} NMR** (79.49 MHz, C<sub>6</sub>D<sub>6</sub>, SiMe<sub>4</sub>, 297 K) [ppm]:  $\delta$  = -2.8 (s). **IR** (solid) [cm<sup>-1</sup>]:  $\nu$  = 3248, 2968, 2085, 2002, 1817, 1541, 1469, 1392, 1360, 1317, 1252. **EA** [%]: calculated for C<sub>18</sub>H<sub>28</sub>BNNi<sub>2</sub>OSi: C 50.20, H 6.55, N 3.25; found: C 50.29, H 6.62, N 3.20. **DTA** [°C]: mp = 114, decomp.  $\geq$  235.

**Synthesis of [({ $\eta^5$ -C<sub>5</sub>H<sub>4</sub>Me)Co}<sub>2</sub>{ $\mu$ -(CO)}<sub>2</sub>{ $\mu$ -BN(SiMe<sub>3</sub>)(tBu)}] (4).** A solution of [({ $\eta^5$ -C<sub>5</sub>H<sub>4</sub>Me)Co(CO)<sub>2</sub>] (42 mg, 0.22 mmol) and [(OC)<sub>5</sub>Cr{BN(SiMe<sub>3</sub>)(tBu)}] (30 mg, 0.086 mmol) in hexane (2 mL) was irradiated with a high-pressure Hg lamp at room temperature for approximately 8 h. Monitoring of the reaction mixture was undertaken *via* <sup>11</sup>B{<sup>1</sup>H} NMR spectroscopy which showed the formation of two distinct products at  $\delta$  = 81 ppm and  $\delta$  = 104 ppm, which are proposed to correspond to the terminal and bridging borylene ligand coordination modes in solution. Once complete consumption of the [(OC)<sub>5</sub>Cr{BN(SiMe<sub>3</sub>)(tBu)}] was observed, irradiation was halted and all volatiles were removed under high vacuum (0.001 Torr). The resulting solid material was redissolved in hexamethyldisiloxane and filtered through a column (0.5 x 2.0 cm) of pacified silica gel.<sup>6</sup> Storage of this filtered solution at -30 °C for a week yielded [({ $\eta^5$ -C<sub>5</sub>H<sub>4</sub>Me)Co}<sub>2</sub>{ $\mu$ -(CO)}<sub>2</sub>{ $\mu$ -BN(SiMe<sub>3</sub>)(tBu)}] as a dark red crystalline solid. The supernatant was subsequently decanted and the crystalline material dried under vacuum to give [({ $\eta^5$ -C<sub>5</sub>H<sub>4</sub>Me)Co}<sub>2</sub>{ $\mu$ -(CO)}<sub>2</sub>{ $\mu$ -BN(SiMe<sub>3</sub>)(tBu)}] (27 mg, 0.056 mmol) in 65% yield. Crystals suitable for X-ray diffraction were grown from saturated solutions of [({ $\eta^5$ -C<sub>5</sub>H<sub>4</sub>Me)Co}<sub>2</sub>{ $\mu$ -(CO)}<sub>2</sub>{ $\mu$ -BN(SiMe<sub>3</sub>)(tBu)}] in hexane. **<sup>1</sup>H NMR** (500.13 MHz, C<sub>6</sub>D<sub>6</sub>, 297 K) [ppm]:  $\delta$  = 4.75 (s, 4H,  $\eta^5$ -C<sub>5</sub>H<sub>4</sub>CH<sub>3</sub>), 4.49 (s, 4H,  $\eta^5$ -C<sub>5</sub>H<sub>4</sub>CH<sub>3</sub>), 1.94 (s, 6H,  $\eta^5$ -C<sub>5</sub>H<sub>4</sub>CH<sub>3</sub>), 1.40 (s, 9H, C-(CH<sub>3</sub>)<sub>3</sub>), 0.34 (s, 9H, Si-(CH<sub>3</sub>)<sub>3</sub>). **<sup>13</sup>C{<sup>1</sup>H} NMR** (125.77 MHz, C<sub>6</sub>D<sub>6</sub>, 297 K) [ppm]:  $\delta$  = 103.2 (s, 2C, *ipso*-C of  $\eta^5$ -C<sub>5</sub>H<sub>4</sub>CH<sub>3</sub>), 88.6 (s, 4C,  $\eta^5$ -C<sub>5</sub>H<sub>4</sub>CH<sub>3</sub>), 88.3 (s, 4C,  $\eta^5$ -C<sub>5</sub>H<sub>4</sub>CH<sub>3</sub>), 56.8 (s, 1C, C-(CH<sub>3</sub>)<sub>3</sub>), 33.6 (s, 3C, C-(CH<sub>3</sub>)<sub>3</sub>), 13.2 (s, 2C,  $\eta^5$ -C<sub>5</sub>H<sub>4</sub>CH<sub>3</sub>), 5.9 (s, 3C, Si-(CH<sub>3</sub>)<sub>3</sub>, <sup>1</sup>J<sub>C-Si</sub> = 57 Hz). **<sup>13</sup>C{<sup>1</sup>H} DEPT135 NMR** (125.77 MHz, C<sub>6</sub>D<sub>6</sub>, 297 K) [ppm]:  $\delta$  = 88.6 (s, 4C,  $\eta^5$ -C<sub>5</sub>H<sub>4</sub>CH<sub>3</sub>), 88.3 (s, 4C,  $\eta^5$ -C<sub>5</sub>H<sub>4</sub>CH<sub>3</sub>), 33.6 (s, 3C, C-(CH<sub>3</sub>)<sub>3</sub>), 13.2 (s, 2C,  $\eta^5$ -C<sub>5</sub>H<sub>4</sub>CH<sub>3</sub>), 5.9 (s, 3C, Si-(CH<sub>3</sub>)<sub>3</sub>, <sup>1</sup>J<sub>C-Si</sub> = 57 Hz). **<sup>11</sup>B{<sup>1</sup>H} NMR** (160.47 MHz, C<sub>6</sub>D<sub>6</sub>, BF<sub>3</sub>.OEt<sub>2</sub>, 297 K) [ppm]:  $\delta$  = 103.6 (br s). **<sup>29</sup>Si{<sup>1</sup>H} NMR** (79.49 MHz, C<sub>6</sub>D<sub>6</sub>, SiMe<sub>4</sub>, 297 K) [ppm]:  $\delta$  = -2.8 (s). **IR** (solid) [cm<sup>-1</sup>]:  $\nu$  = 3738, 2927, 2851, 2224, 1762, 1713, 1686, 1594, 1495, 1445, 1354, 1300, 1254. **EA** [%]: calculated for C<sub>21</sub>H<sub>32</sub>BCo<sub>2</sub>NO<sub>2</sub>Si: C 51.76, H 6.62, N 2.87; found: C 51.12, H 6.43, N 2.59.

**Synthesis of [({ $\eta^5$ -C<sub>5</sub>Me<sub>5</sub>)Ir{BN(SiMe<sub>3</sub>)(tBu)}<sub>2</sub>] (5).** A solution of [({ $\eta^5$ -C<sub>5</sub>Me<sub>5</sub>)Ir(CO)<sub>2</sub>] (23 mg, 0.060 mmol) and [(OC)<sub>5</sub>Cr{BN(SiMe<sub>3</sub>)(tBu)}] (46 mg, 0.13 mmol) in hexane (2 mL) was irradiated with a high-pressure Hg lamp at room temperature for approximately 12 h. After completion of the reaction was ascertained *via* monitoring by <sup>11</sup>B{<sup>1</sup>H} NMR spectroscopy, all volatiles were removed under high

vacuum (0.001 Torr). The resulting solid material was redissolved in hexamethyldisiloxane and filtered through a column (0.5 x 2.0 cm) of pacified silica gel.<sup>6</sup> Storage of this filtered solution in the -30 °C freezer for a week yielded  $[(\eta^5\text{-C}_5\text{Me}_5)\text{Ir}\{\text{BN}(\text{SiMe}_3)(\text{tBu})\}_2]$  as a light yellow crystalline solid. The supernatant was subsequently decanted and the crystalline material dried under vacuum to give  $[(\eta^5\text{-C}_5\text{Me}_5)\text{Ir}\{\text{BN}(\text{SiMe}_3)(\text{tBu})\}_2]$  (22 mg, 0.035 mmol) in 58% yield. Crystals suitable for X-ray diffraction were grown from saturated solutions of  $[(\eta^5\text{-C}_5\text{Me}_5)\text{Ir}\{\text{BN}(\text{SiMe}_3)(\text{tBu})\}_2]$  in hexane. **<sup>1</sup>H NMR** (500.13 MHz, C<sub>6</sub>D<sub>6</sub>, 297 K) [ppm]:  $\delta$  = 2.35 (s, 15H,  $\eta^5\text{-C}_5(\text{CH}_3)_5$ ), 1.45 (s, 18H, C-(CH<sub>3</sub>)<sub>3</sub>), 0.44 (s, 18H, Si-(CH<sub>3</sub>)<sub>3</sub>, <sup>2</sup>J<sub>H-Si</sub> = 6.7 Hz). **<sup>13</sup>C{<sup>1</sup>H} NMR** (125.77 MHz, C<sub>6</sub>D<sub>6</sub>, 297 K) [ppm]:  $\delta$  = 94.7 (s, 5C,  $\eta^5\text{-C}_5(\text{CH}_3)_5$ ), 52.0 (s, 2C, C-(CH<sub>3</sub>)<sub>3</sub>), 34.0 (s, 6C, C-(CH<sub>3</sub>)<sub>3</sub>), 11.8 (s, 5C,  $\eta^5\text{-C}_5(\text{CH}_3)_5$ ), 4.5 (s, 6C, Si-(CH<sub>3</sub>)<sub>3</sub>, <sup>1</sup>J<sub>C-Si</sub> = 57 Hz). **<sup>13</sup>C{<sup>1</sup>H} DEPT135 NMR** (125.77 MHz, C<sub>6</sub>D<sub>6</sub>, 297 K) [ppm]:  $\delta$  = 34.0 (s, 6C, C-(CH<sub>3</sub>)<sub>3</sub>), 11.8 (s, 5C,  $\eta^5\text{-C}_5(\text{CH}_3)_5$ ), 4.5 (s, 6C, Si-(CH<sub>3</sub>)<sub>3</sub>). **<sup>11</sup>B{<sup>1</sup>H} NMR** (160.47 MHz, C<sub>6</sub>D<sub>6</sub>, BF<sub>3</sub>·OEt<sub>2</sub>, 297 K) [ppm]:  $\delta$  = 70.8 (br s). **<sup>29</sup>Si{<sup>1</sup>H} NMR** (79.49 MHz, C<sub>6</sub>D<sub>6</sub>, SiMe<sub>4</sub>, 297 K) [ppm]:  $\delta$  = -1.2 (s). **IR** (solid) [cm<sup>-1</sup>]:  $\nu$  = 3749, 3249, 2964, 2897, 2002, 1653, 1408, 1363, 1252. **EA** [%]: calculated for C<sub>24</sub>H<sub>51</sub>B<sub>2</sub>IrN<sub>2</sub>Si<sub>2</sub>: C 45.20, H 8.06, N 4.39; found: C 45.24, H 8.05, N 4.38. **DTA** [°C]: mp = 128, decomp.  $\geq$  301.



## Crystal Structure Determination

The crystal data were collected on a BRUKER X8-APEX II diffractometer with a CCD area detector and multi-layer mirror monochromated  $\text{Mo}_{K\alpha}$  radiation. The structure was solved using the intrinsic phasing method,<sup>7</sup> refined with the SHELXL program<sup>8</sup> and expanded using Fourier techniques. All non-hydrogen atoms were refined anisotropically. Hydrogen atoms were included in structure factor calculations. All hydrogen atoms were assigned to idealised geometric positions.

The structures **1a**, **4**, and **5** showed disorder of  $\text{N}(t\text{Bu})(\text{SiMe}_3)$  moiety (91:8, 89:11, and 50:50, respectively; two-fold axis). The N–Si and N–C distances were thus restrained (DFIX) using data obtained from a CSD search. As there are known structures of borylenes with  $\text{N}(\text{SiMe}_3)_2$  groups, the accuracy of this parameter was higher, and thus the standard deviation used for this bond was set to 0.01. For the N–C distance no comparable borylenes are known and a general CSD search delivered a much wider range of bond lengths. Here we used a standard deviation of 0.02. For all disordered atoms the similarity restraint SIMU and rigid body restraint RIGU was applied to the atomic displacement parameters (ADP). The similarity of the N–C and N–Si distances in conjunction with the difference of structure factors of C/Si atoms caused problems with the refinement of the ADPs of silicon and tertiary carbon. Even the use of ADP constraints had no detectable influence on the resulting ellipsoids. Only an extremely small standard deviation value ( $<0.002$ ) in the ISOR keyword (approximate isotropic behavior of listed atoms) led to reasonable shapes of both ellipsoids. All of the above con- and restraints were necessary to obtain physically meaningful and stable refinement. It can be assumed that these restraints have no large influence on the structural parameters of the rest of the molecule, but we still consider these data as proof of connectivity only.

**Crystal data for  $[(\text{OC})_5\text{Cr}\{\text{BN}(\text{SiMe}_3)(t\text{Bu})\}]$  (**1a**; CCDC: 2032809):**  $\text{C}_{12}\text{H}_{18}\text{BCrNO}_5\text{Si}$ ,  $M_r = 347.17$ , colourless plate,  $0.30 \times 0.20 \times 0.09 \text{ mm}^3$ , monoclinic space group  $P2_1/n$ ,  $a = 6.4770(15) \text{ \AA}$ ,  $b = 13.825(2) \text{ \AA}$ ,  $c = 19.041(3) \text{ \AA}$ ,  $\beta = 93.196(8)^\circ$ ,  $V = 1702.4(6) \text{ \AA}^3$ ,  $Z = 4$ ,  $\rho_{\text{calcd}} = 1.355 \text{ g}\cdot\text{cm}^{-3}$ ,  $\mu = 0.758 \text{ mm}^{-1}$ ,  $F(000) = 720$ ,  $T = 100(2) \text{ K}$ ,  $R_1 = 0.0414$ ,  $wR^2 = 0.0861$ , 4599 independent reflections [ $2\theta \leq 60.218^\circ$ ] and 227 parameters.

**Crystal data for  $[(\text{OC})_5\text{Mo}\{\text{BN}(\text{SiMe}_3)(t\text{Bu})\}]$  (**1b**; CCDC: 2032810):**  $\text{C}_{12}\text{H}_{18}\text{BMoNO}_5\text{Si}$ ,  $M_r = 391.11$ , colourless plate,  $0.36 \times 0.22 \times 0.06 \text{ mm}^3$ , monoclinic space group  $P2_1/c$ ,  $a = 15.031(4) \text{ \AA}$ ,  $b = 6.6210(14) \text{ \AA}$ ,  $c = 18.182(4) \text{ \AA}$ ,  $\beta = 105.893(12)^\circ$ ,  $V = 1740.4(7) \text{ \AA}^3$ ,  $Z = 4$ ,  $\rho_{\text{calcd}} = 1.493 \text{ g}\cdot\text{cm}^{-3}$ ,

$\mu = 0.838 \text{ mm}^{-1}$ ,  $F(000) = 792$ ,  $T = 100(2) \text{ K}$ ,  $R_1 = 0.0348$ ,  $wR^2 = 0.0610$ , 5423 independent reflections [ $2\theta \leq 65.344^\circ$ ] and 196 parameters.

**Crystal data for [(OC)<sub>5</sub>W{BN(SiMe<sub>3</sub>)(tBu)}] (1c; CCDC: 2032811):** C<sub>12</sub>H<sub>18</sub>BNO<sub>5</sub>SiW,  $M_r = 479.02$ , colourless block, 0.50×0.32×0.20 mm<sup>3</sup>, monoclinic space group  $P2_1/c$ ,  $a = 14.971(4) \text{ \AA}$ ,  $b = 6.5880(18) \text{ \AA}$ ,  $c = 18.181(4) \text{ \AA}$ ,  $\beta = 106.059(9)^\circ$ ,  $V = 1723.2(7) \text{ \AA}^3$ ,  $Z = 4$ ,  $\rho_{\text{calcd}} = 1.846 \text{ g}\cdot\text{cm}^{-3}$ ,  $\mu = 6.789 \text{ mm}^{-1}$ ,  $F(000) = 920$ ,  $T = 100(2) \text{ K}$ ,  $R_1 = 0.0210$ ,  $wR^2 = 0.0399$ , 5446 independent reflections [ $2\theta \leq 65.968^\circ$ ] and 196 parameters.

**Crystal data for [(\eta<sup>5</sup>-C<sub>5</sub>H<sub>5</sub>)(OC)<sub>3</sub>V{BN(SiMe<sub>3</sub>)(tBu)}] (2; CCDC: 2032812):** C<sub>15</sub>H<sub>23</sub>BNO<sub>3</sub>SiV,  $M_r = 355.18$ , yellow block, 0.33×0.24×0.084 mm<sup>3</sup>, orthorhombic space group  $Pbca$ ,  $a = 13.380(5) \text{ \AA}$ ,  $b = 13.438(5) \text{ \AA}$ ,  $c = 19.996(7) \text{ \AA}$ ,  $V = 3595(2) \text{ \AA}^3$ ,  $Z = 8$ ,  $\rho_{\text{calcd}} = 1.312 \text{ g}\cdot\text{cm}^{-3}$ ,  $\mu = 0.628 \text{ mm}^{-1}$ ,  $F(000) = 1488$ ,  $T = 100(2) \text{ K}$ ,  $R_1 = 0.0280$ ,  $wR^2 = 0.0640$ , 3843 independent reflections [ $2\theta \leq 53.832^\circ$ ] and 205 parameters.

**Crystal data for [(\eta<sup>5</sup>-C<sub>5</sub>H<sub>5</sub>)Ni]<sub>2</sub>(μ-CO){μ-BN(SiMe<sub>3</sub>)(tBu)}] (3; polymorph 1; CCDC: 2032813):** C<sub>18</sub>H<sub>28</sub>BNNi<sub>2</sub>OSi,  $M_r = 430.73$ , yellow block, 0.30×0.15×0.08 mm<sup>3</sup>, monoclinic space group  $P2_1/c$ ,  $a = 12.436(3) \text{ \AA}$ ,  $b = 9.8525(18) \text{ \AA}$ ,  $c = 16.497(3) \text{ \AA}$ ,  $\beta = 96.081(14)^\circ$ ,  $V = 2010.0(7) \text{ \AA}^3$ ,  $Z = 4$ ,  $\rho_{\text{calcd}} = 1.423 \text{ g}\cdot\text{cm}^{-3}$ ,  $\mu = 1.937 \text{ mm}^{-1}$ ,  $F(000) = 904$ ,  $T = 100(2) \text{ K}$ ,  $R_1 = 0.0533$ ,  $wR^2 = 0.0970$ , 6217 independent reflections [ $2\theta \leq 65.564^\circ$ ] and 223 parameters. **Crystal data for [(\eta<sup>5</sup>-C<sub>5</sub>H<sub>5</sub>)Ni]<sub>2</sub>(μ-CO){μ-BN(SiMe<sub>3</sub>)(tBu)}] (3; polymorph 2; CCDC 2032815):** C<sub>18</sub>H<sub>28</sub>BNNi<sub>2</sub>OSi,  $M_r = 430.73$ , yellow plate, 0.10×0.06×0.03 mm<sup>3</sup>, monoclinic space group  $C2/c$ ,  $a = 26.480(10) \text{ \AA}$ ,  $b = 9.257(3) \text{ \AA}$ ,  $c = 16.494(8) \text{ \AA}$ ,  $\beta = 100.343(8)^\circ$ ,  $V = 3977(3) \text{ \AA}^3$ ,  $Z = 8$ ,  $\rho_{\text{calcd}} = 1.439 \text{ g}\cdot\text{cm}^{-3}$ ,  $\mu = 1.958 \text{ mm}^{-1}$ ,  $F(000) = 1808$ ,  $T = 100(2) \text{ K}$ ,  $R_1 = 0.0824$ ,  $wR^2 = 0.0888$ , 5543 independent reflections [ $2\theta \leq 59.334^\circ$ ] and 223 parameters.

**Crystal data for [(\eta<sup>5</sup>-C<sub>5</sub>H<sub>4</sub>Me)Co]<sub>2</sub>(μ-CO)<sub>2</sub>{μ-BN(SiMe<sub>3</sub>)(tBu)}] (4; CCDC: 2032816):** C<sub>21</sub>H<sub>32</sub>BCo<sub>2</sub>NO<sub>2</sub>Si,  $M_r = 487.23$ , red block, 0.12×0.075×0.035 mm<sup>3</sup>, monoclinic space group  $C2/c$ ,  $a = 16.269(12) \text{ \AA}$ ,  $b = 9.827(7) \text{ \AA}$ ,  $c = 16.702(12) \text{ \AA}$ ,  $\beta = 123.96(2)^\circ$ ,  $V = 2215(3) \text{ \AA}^3$ ,  $Z = 4$ ,  $\rho_{\text{calcd}} = 1.461 \text{ g}\cdot\text{cm}^{-3}$ ,  $\mu = 1.568 \text{ mm}^{-1}$ ,  $F(000) = 1016$ ,  $T = 100(2) \text{ K}$ ,  $R_1 = 0.0597$ ,  $wR^2 = 0.1322$ , 2847 independent reflections [ $2\theta \leq 62.33^\circ$ ] and 155 parameters.

**Crystal data for [(\eta<sup>5</sup>-C<sub>5</sub>Me<sub>5</sub>)Ir{BN(SiMe<sub>3</sub>)(tBu)}<sub>2</sub>] (5; CCDC: 2032817):** C<sub>24</sub>H<sub>51</sub>B<sub>2</sub>IrN<sub>2</sub>Si<sub>2</sub>,  $M_r = 637.66$ , colourless block, 0.32×0.19×0.17 mm<sup>3</sup>, monoclinic space group  $P2_1/n$ ,  $a = 8.443(4) \text{ \AA}$ ,

$b = 35.377(19) \text{ \AA}$ ,  $c = 10.387(5) \text{ \AA}$ ,  $\beta = 97.236(14)^\circ$ ,  $V = 3078(3) \text{ \AA}^3$ ,  $Z = 4$ ,  $\rho_{\text{calcd}} = 1.376 \text{ g}\cdot\text{cm}^{-3}$ ,  
 $\mu = 4.429 \text{ mm}^{-1}$ ,  $F(000) = 1296$ ,  $T = 100(2) \text{ K}$ ,  $R_1 = 0.0332$ ,  $wR^2 = 0.0565$ , 8815 independent reflections  
[ $2\theta \leq 61.832^\circ$ ] and 328 parameters.

Crystallographic data have been deposited with the Cambridge Crystallographic Data Center as supplementary publication nos. CCDC-2032809 (**1a**), 2032810 (**1b**), 2032811 (**1c**), 2032812 (**2**), 2032813 (**3**; polymorph 1), 2032815 (**3**; polymorph 2), 2032816 (**4**), 2032817 (**5**). These data can be obtained free of charge from The Cambridge Crystallographic Data Centre *via* [www.ccdc.cam.ac.uk/data\\_request/cif](http://www.ccdc.cam.ac.uk/data_request/cif).

## NMR Spectra

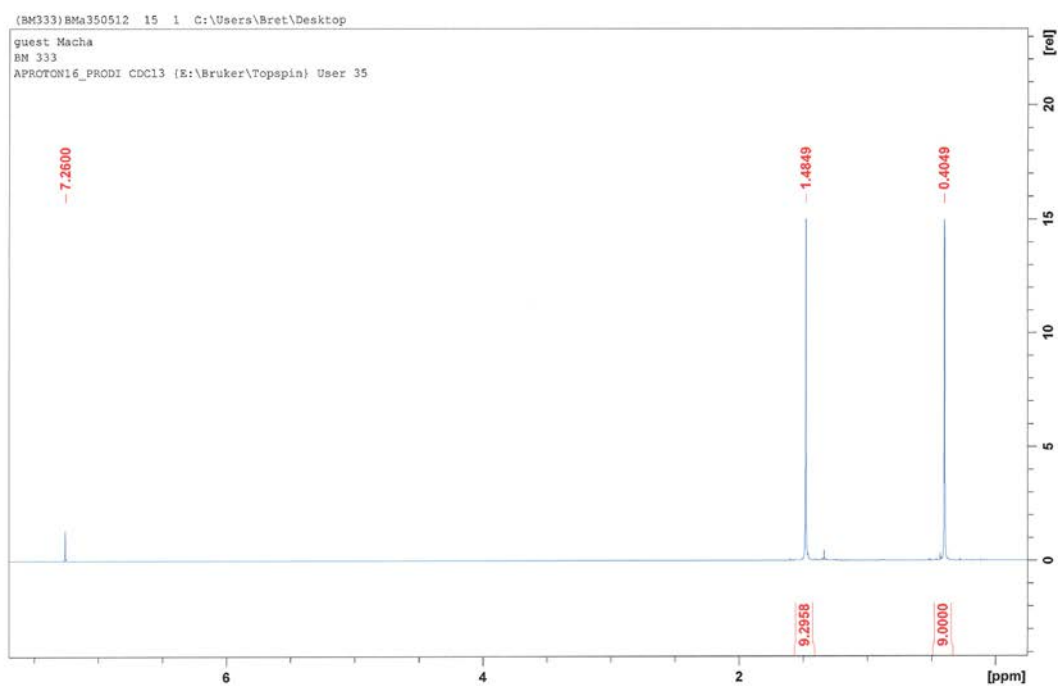

Fig. S1.  $^1\text{H}$  NMR spectrum of  $\text{Br}_2\text{BN}(\text{SiMe}_3)(\text{tBu})$  in  $\text{CDCl}_3$  at RT

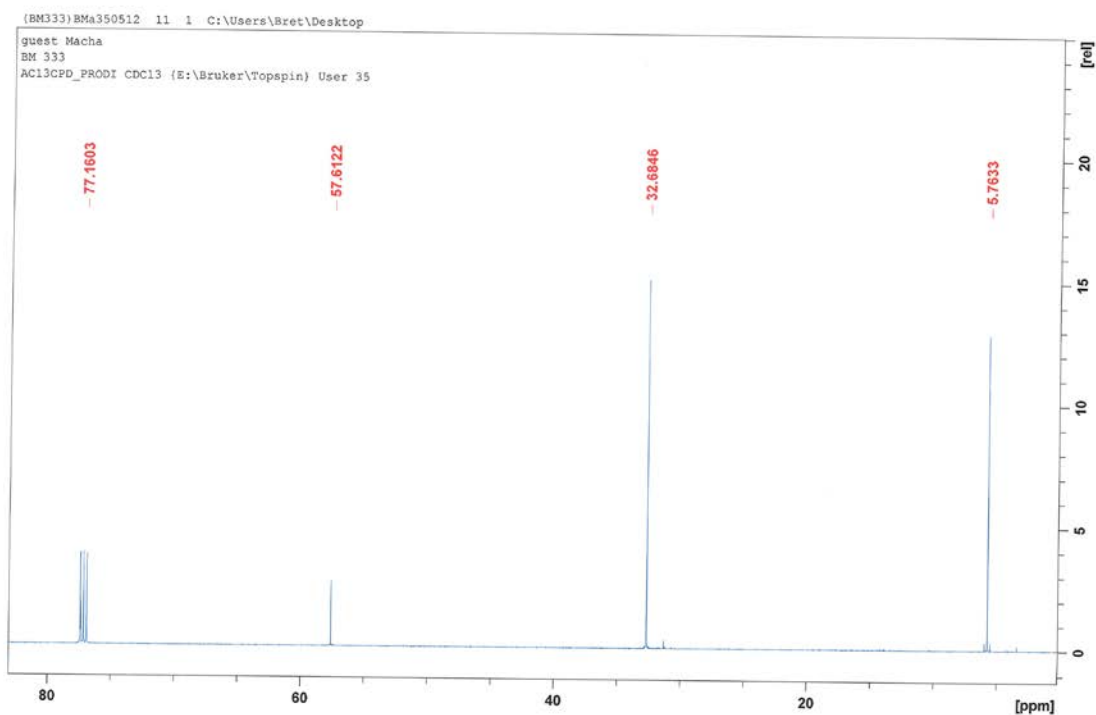

Fig. S2.  $^{13}\text{C}\{^1\text{H}\}$  NMR spectrum of  $\text{Br}_2\text{BN}(\text{SiMe}_3)(\text{tBu})$  in  $\text{CDCl}_3$  at RT

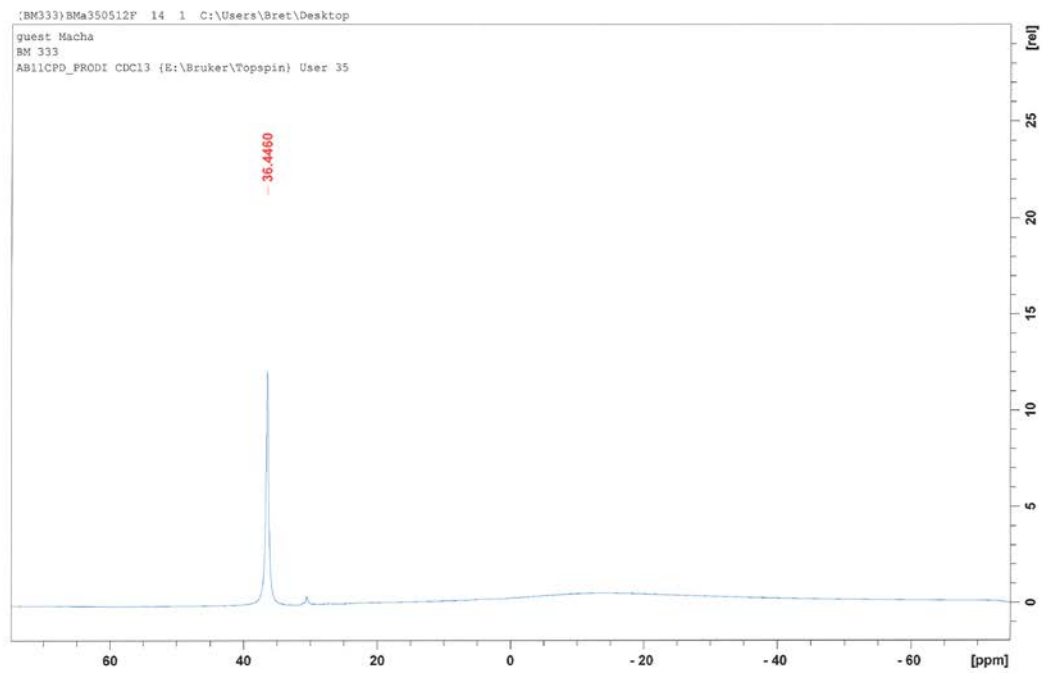

**Fig. S3.**  $^{11}\text{B}\{^1\text{H}\}$  NMR spectrum of  $\text{Br}_2\text{BN}(\text{SiMe}_3)(t\text{Bu})$  in  $\text{CDCl}_3$  at RT

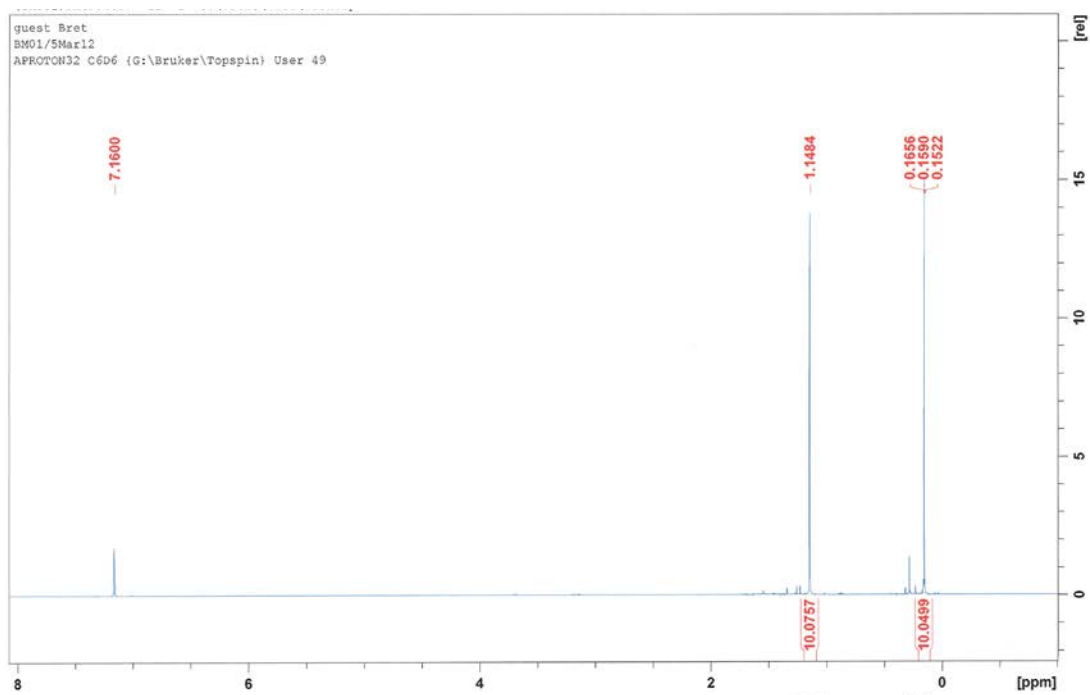

**Fig. S4.**  $^1\text{H}$  NMR spectrum of **1a** in  $\text{C}_6\text{D}_6$  at RT

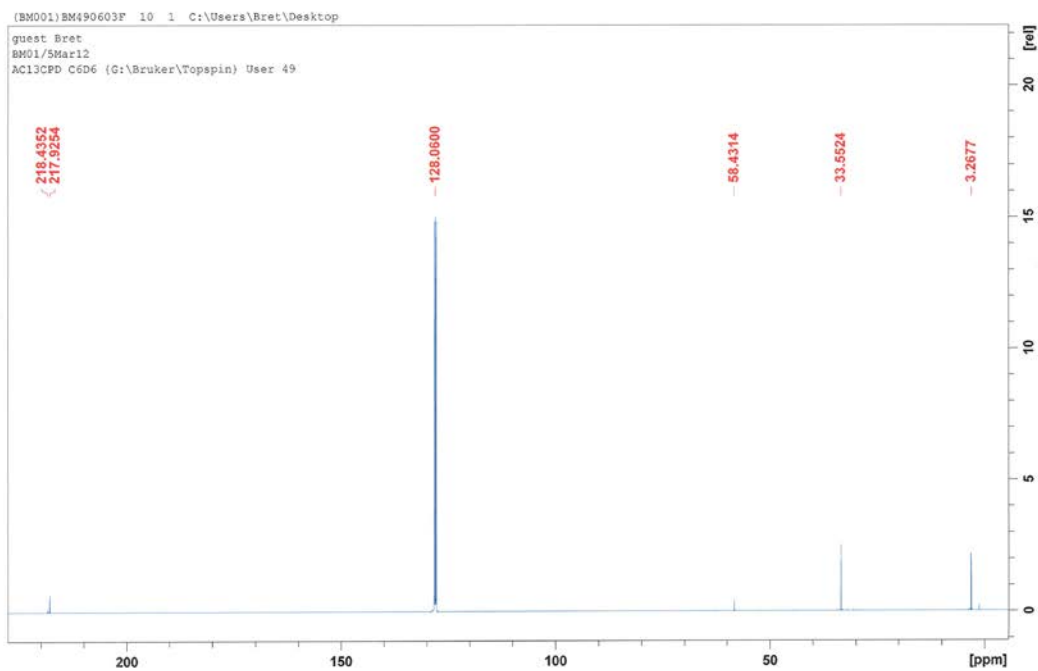

Fig. S5.  $^{13}\text{C}\{^1\text{H}\}$  NMR spectrum of **1a** in  $\text{C}_6\text{D}_6$  at RT.

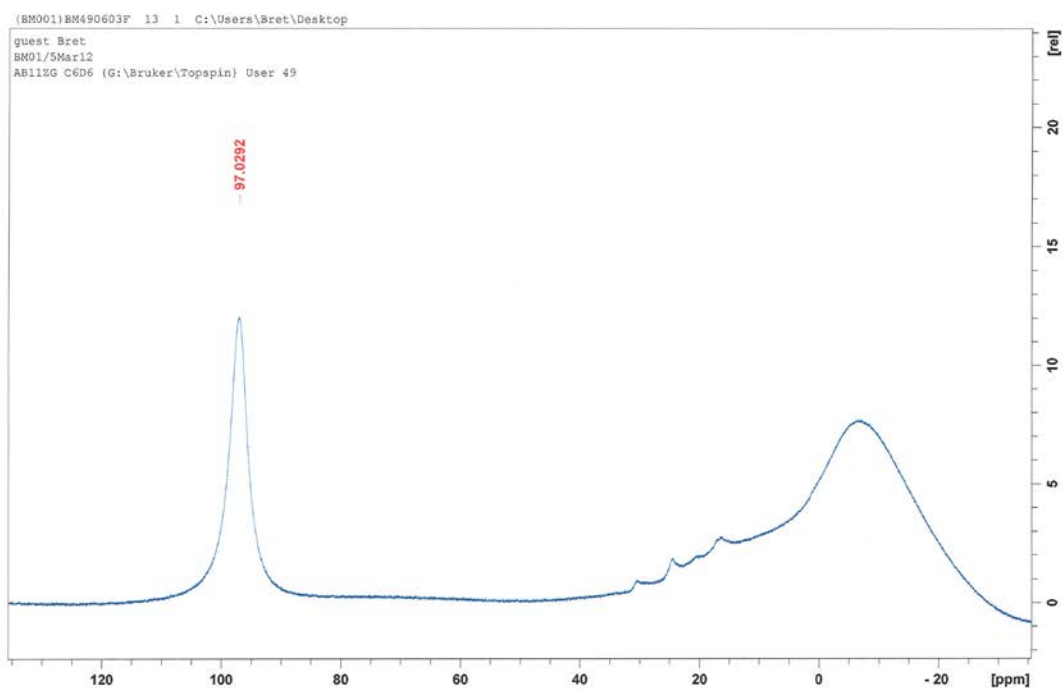

Fig. S6.  $^{11}\text{B}\{^1\text{H}\}$  NMR spectrum of **1a** in  $\text{C}_6\text{D}_6$  at RT.

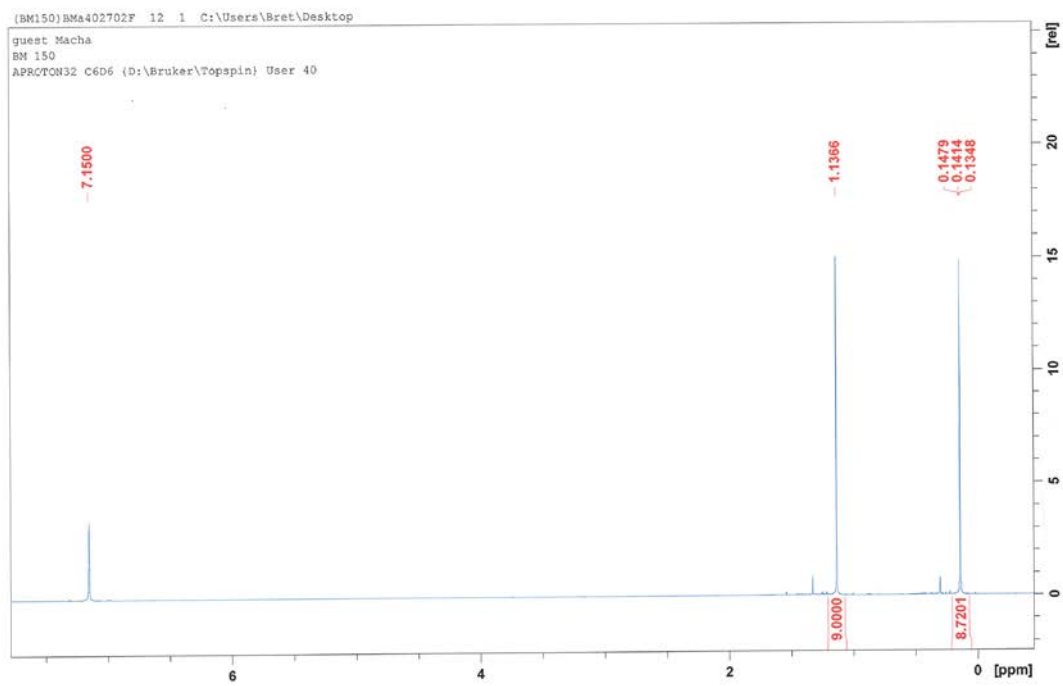

**Fig. S7.**  $^1\text{H}$  NMR spectrum of **1b** in  $\text{C}_6\text{D}_6$  at RT.

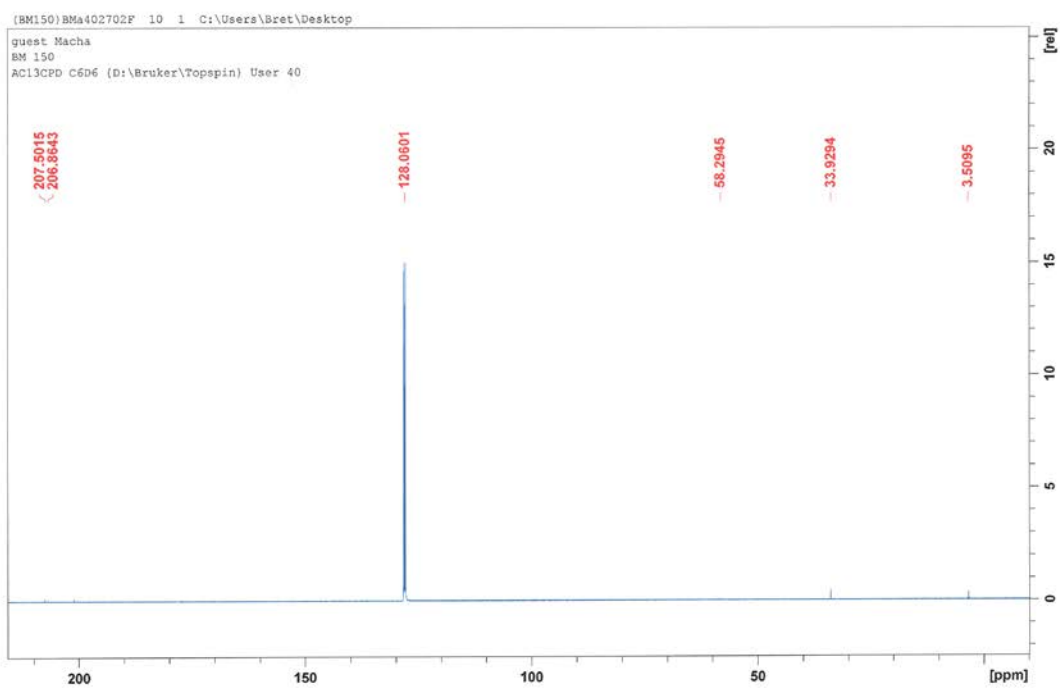

**Fig. S8.**  $^{13}\text{C}\{^1\text{H}\}$  NMR spectrum of **1b** in  $\text{C}_6\text{D}_6$  at RT.

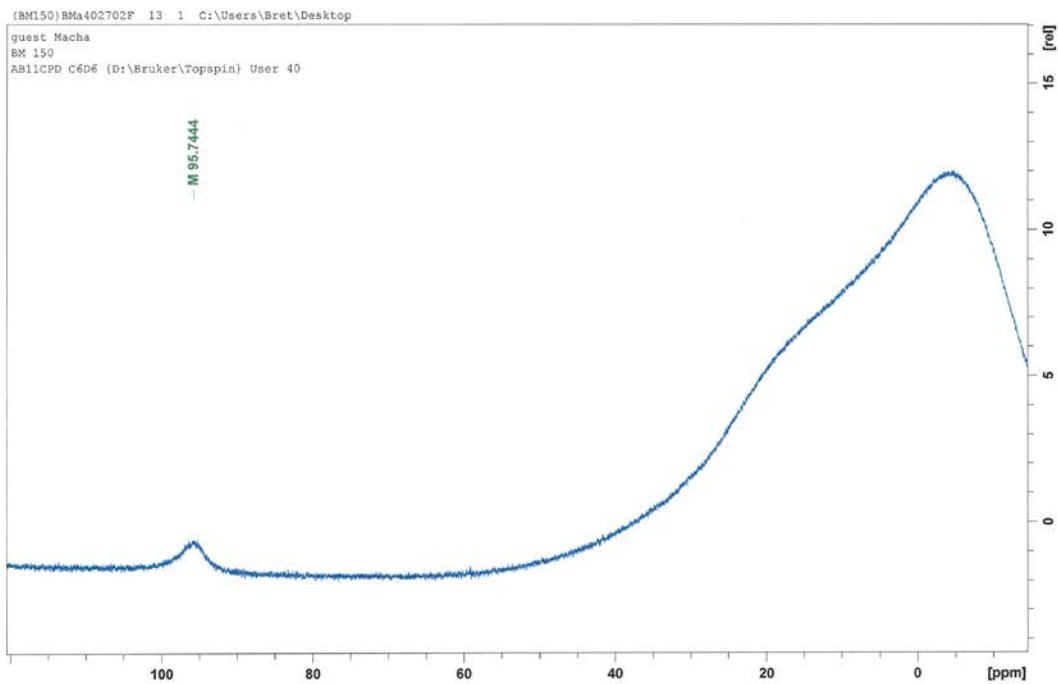

Fig. S9.  $^{11}\text{B}$   $\{^1\text{H}\}$  NMR spectrum of **1b** in  $\text{C}_6\text{D}_6$  at RT.

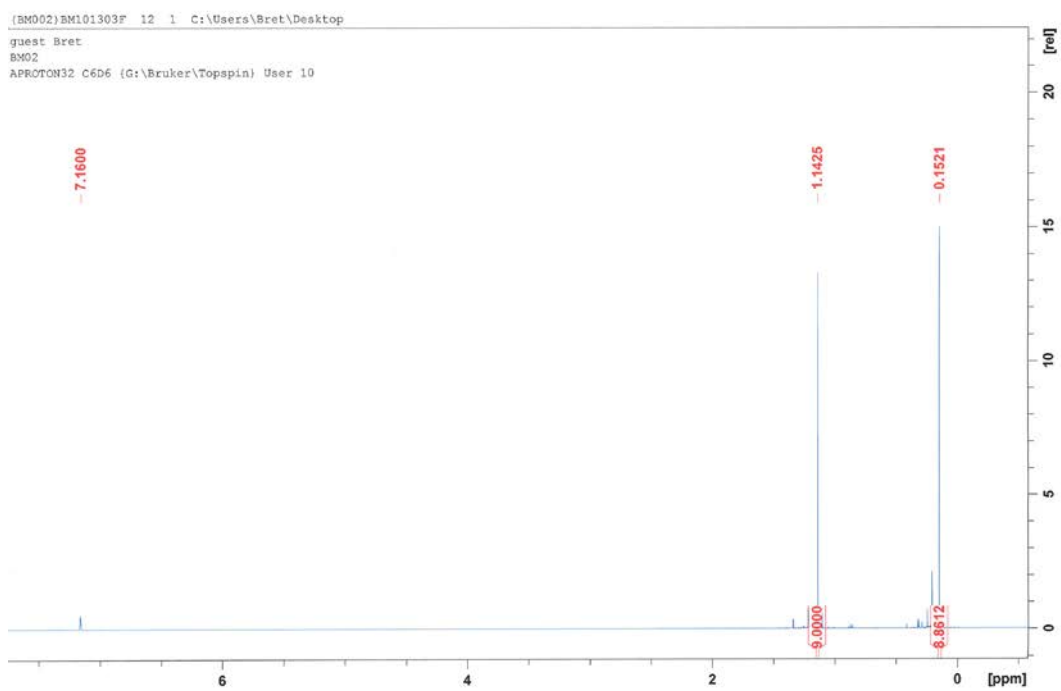

Fig. S10.  $^1\text{H}$  NMR spectrum of **1c** in  $\text{C}_6\text{D}_6$  at RT.



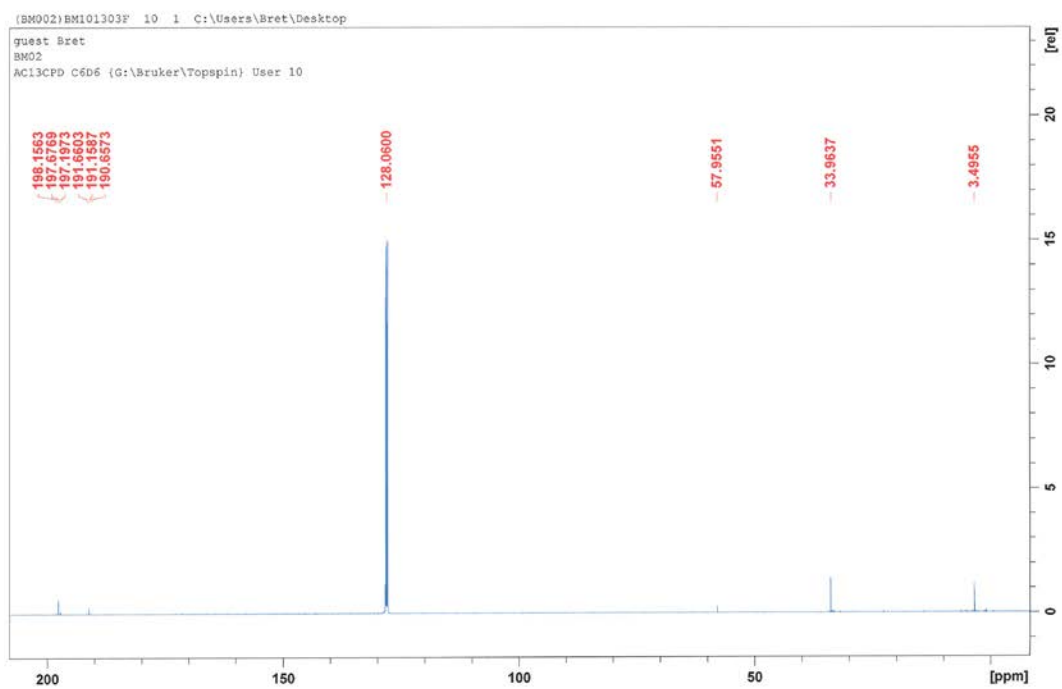

**Fig. S11.**  $^{13}\text{C}\{^1\text{H}\}$  NMR spectrum of **1c** in  $\text{C}_6\text{D}_6$  at RT.

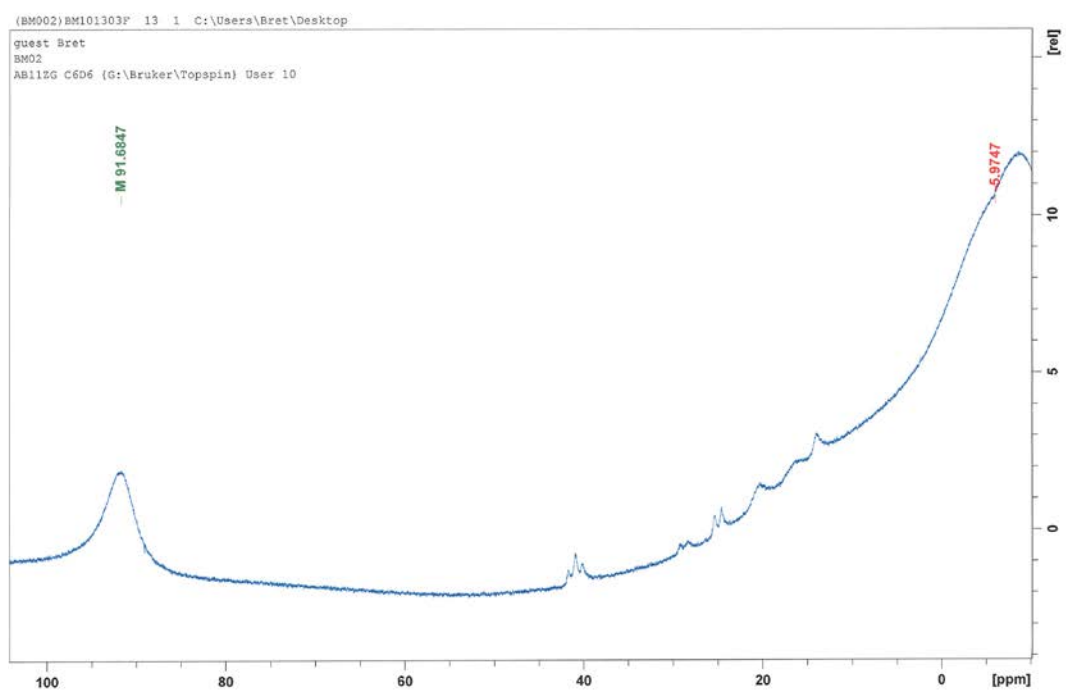

**Fig. S12.**  $^{11}\text{B}\{^1\text{H}\}$  NMR spectrum of **1c** in  $\text{C}_6\text{D}_6$  at RT.

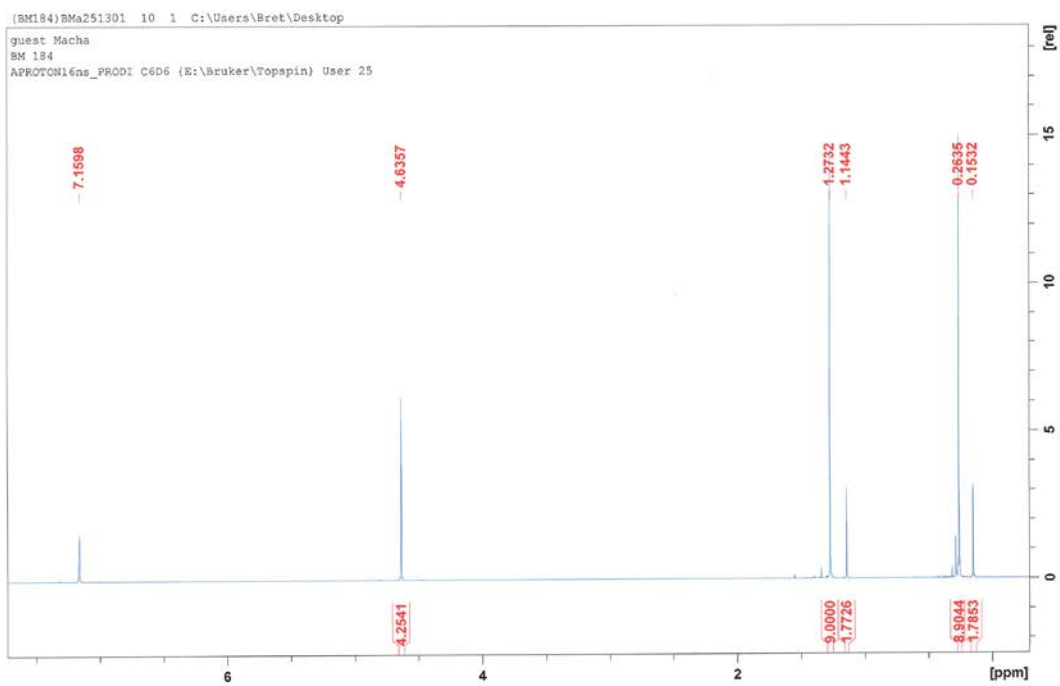

**Fig. S13.**  $^1\text{H}$  NMR spectrum of **2** in  $\text{C}_6\text{D}_6$  at RT.

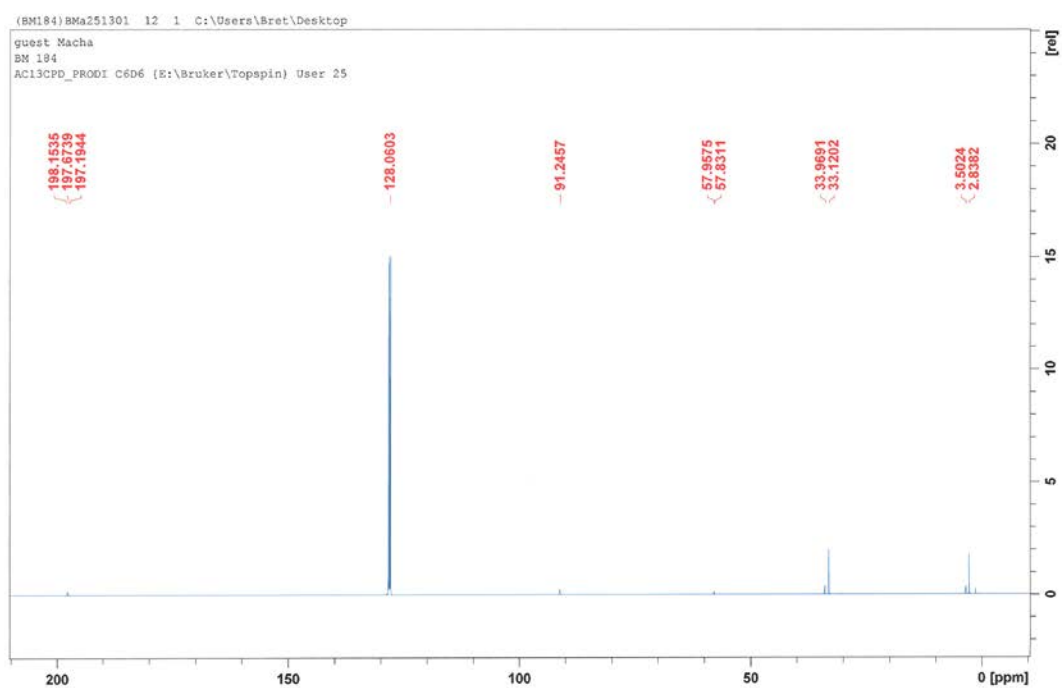

**Fig. S14.**  $^{13}\text{C}\{^1\text{H}\}$  NMR spectrum of **2** in  $\text{C}_6\text{D}_6$  at RT.

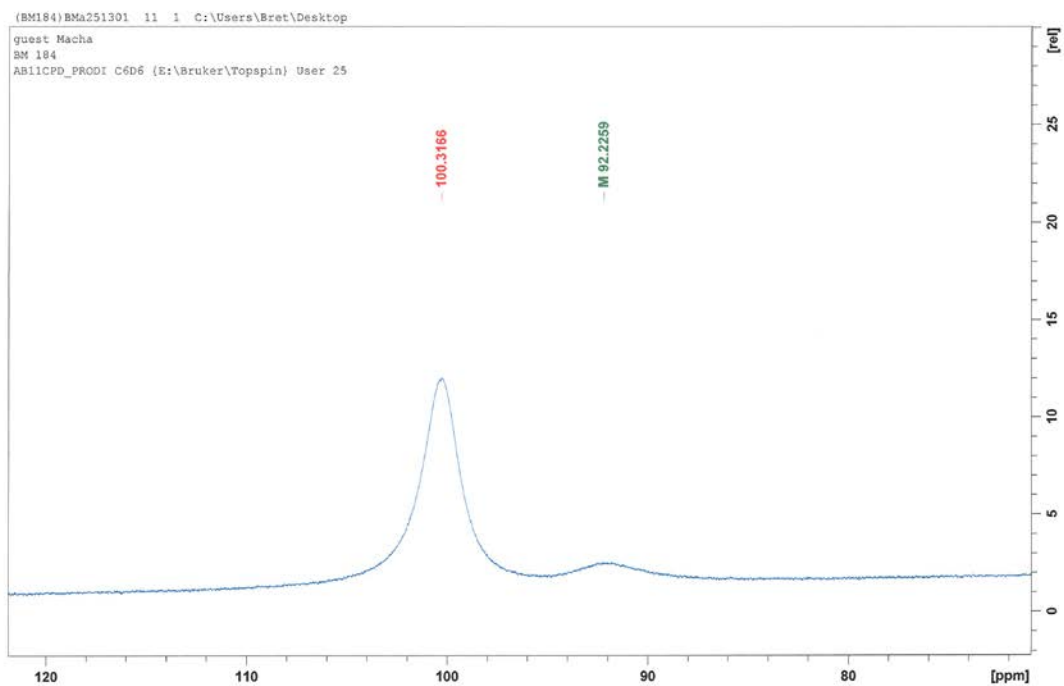

**Fig. S15.**  $^{11}\text{B}\{^1\text{H}\}$  NMR spectrum of **2** in  $\text{C}_6\text{D}_6$  at RT.

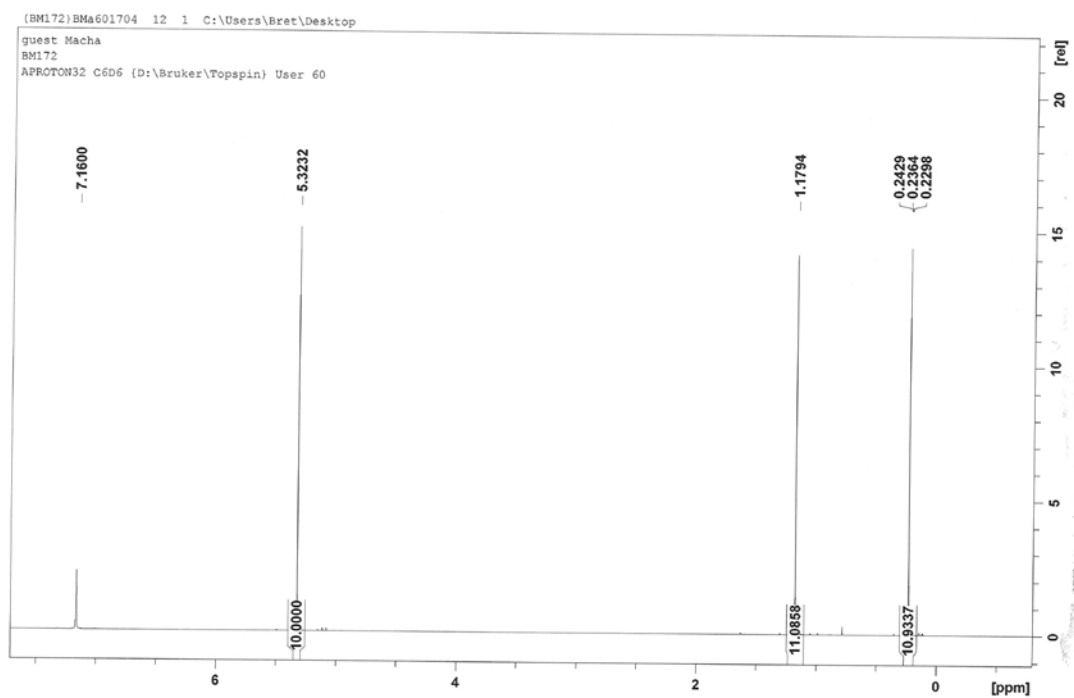

**Fig. S16.**  $^1\text{H}$  NMR spectrum of **3** in  $\text{C}_6\text{D}_6$  at RT.

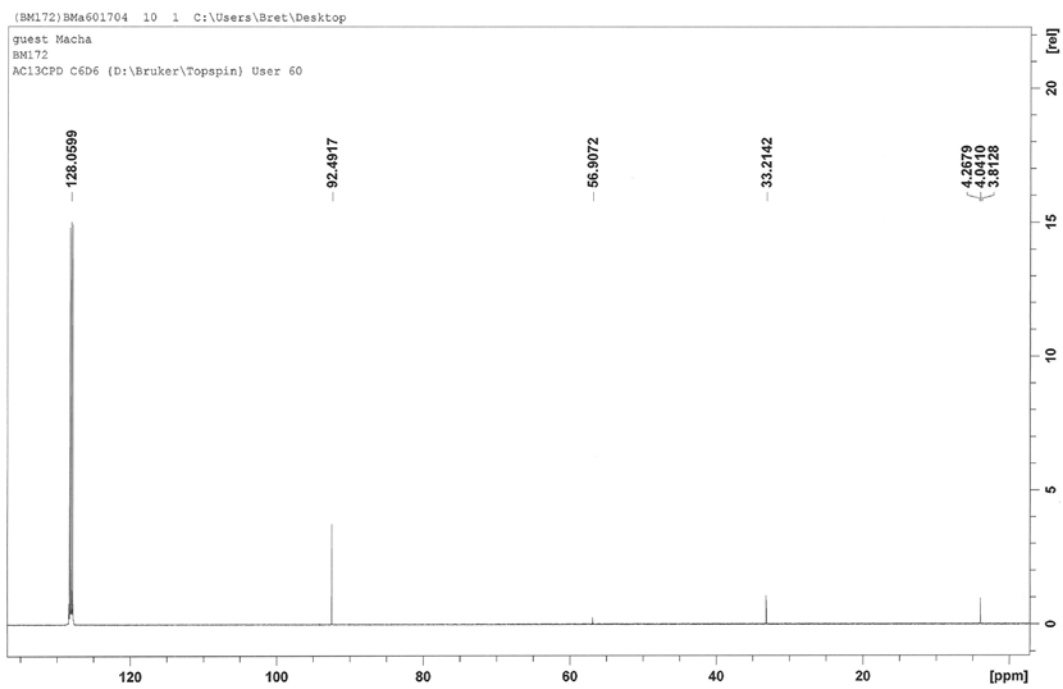

**Fig. S17.**  $^{13}\text{C}\{^1\text{H}\}$  NMR spectrum of **3** in  $\text{C}_6\text{D}_6$  at RT.

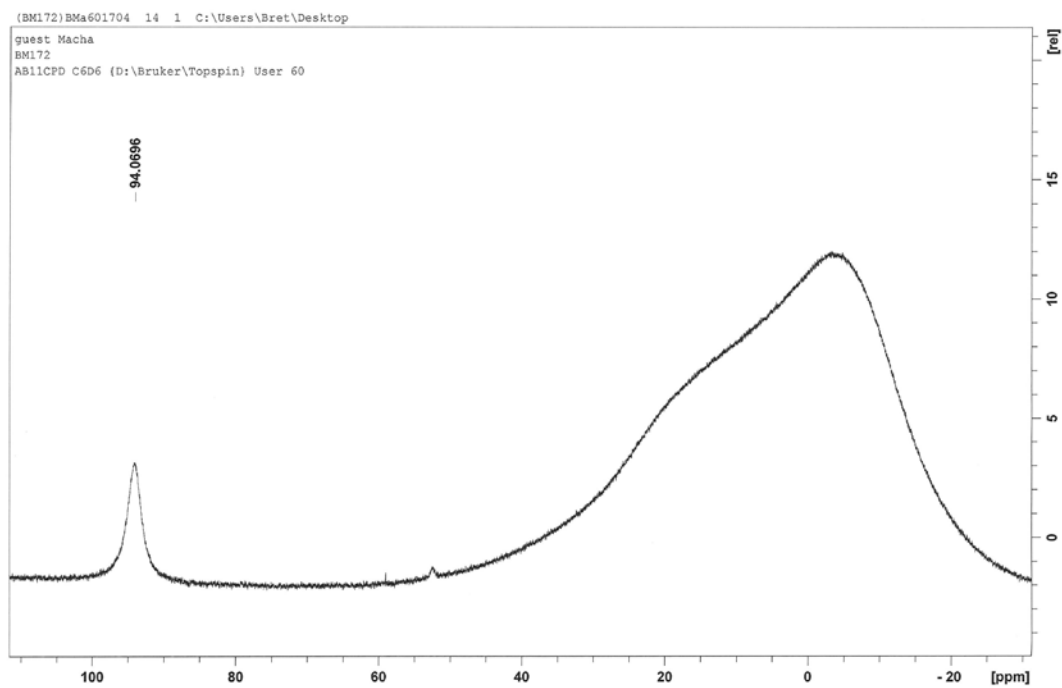

**Fig. S18.**  $^{11}\text{B}\{^1\text{H}\}$  NMR spectrum of **3** in  $\text{C}_6\text{D}_6$  at RT.

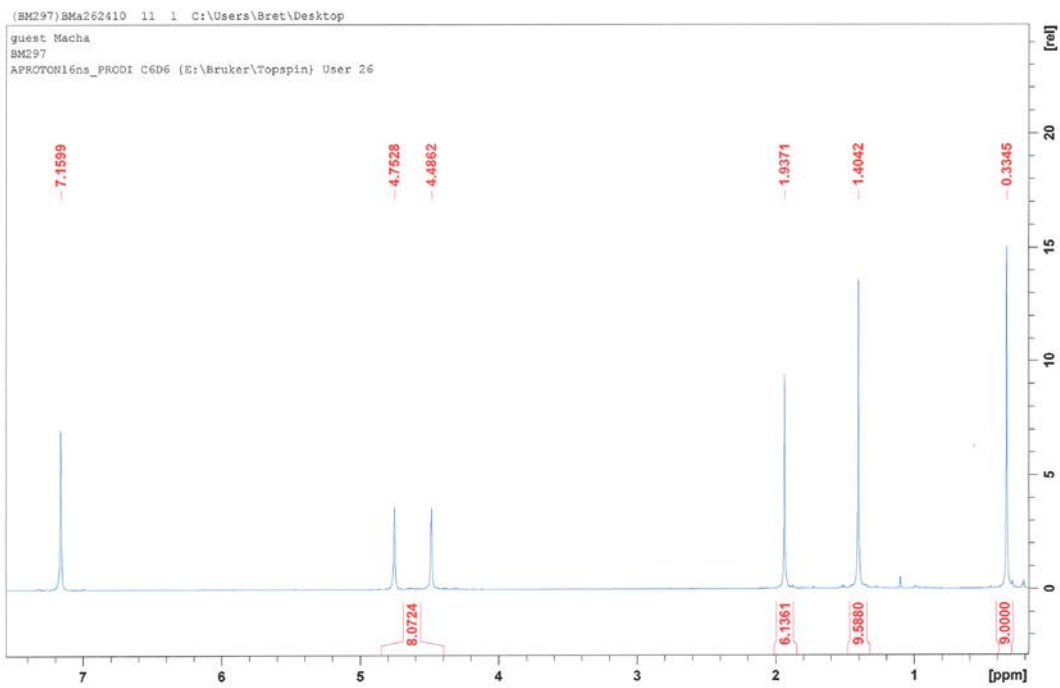

**Fig. S19.**  $^1\text{H}$  NMR spectrum of **4** in  $\text{C}_6\text{D}_6$  at RT.

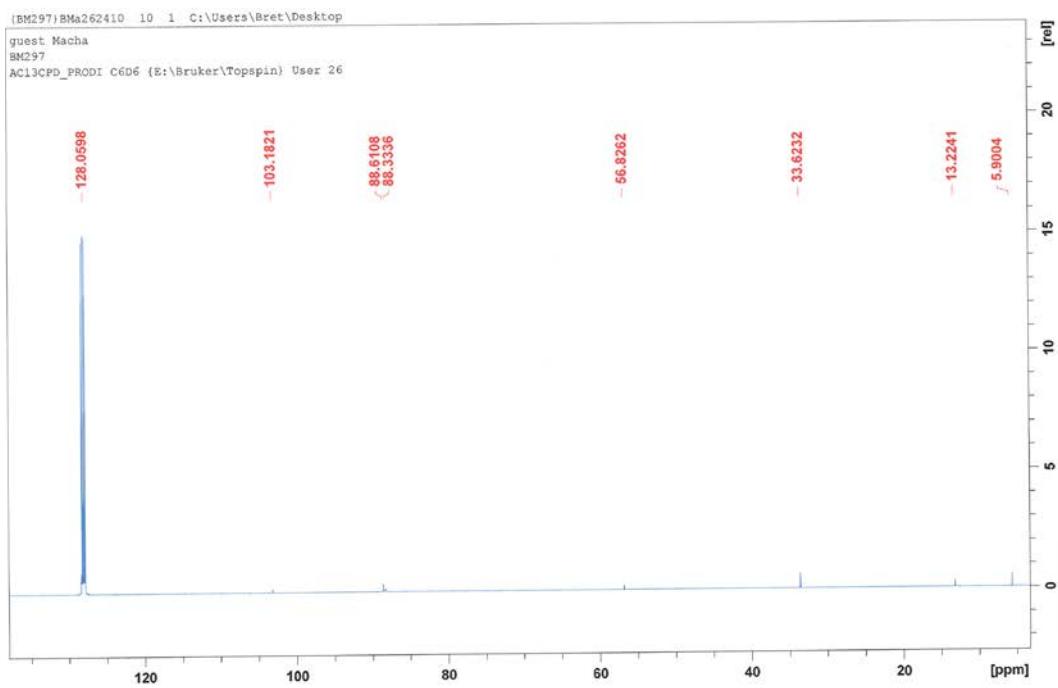

**Fig. S20.**  $^{13}\text{C}\{^1\text{H}\}$  NMR spectrum of **4** in  $\text{C}_6\text{D}_6$  at RT.

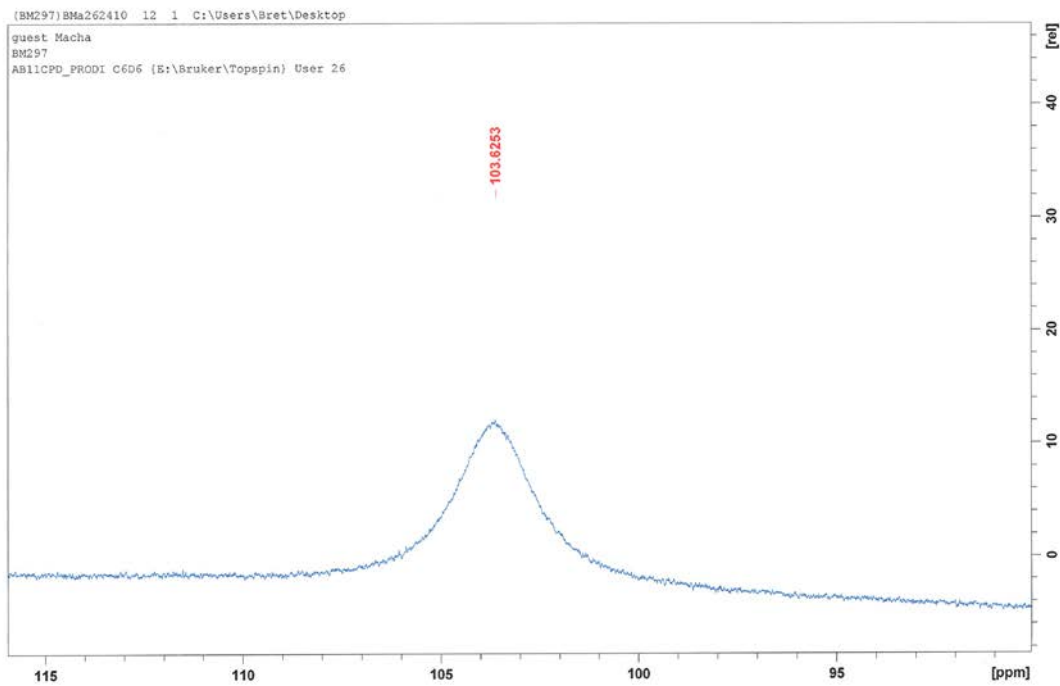

Fig. S21.  $^{11}\text{B}\{^1\text{H}\}$  NMR spectrum of **4** in  $\text{C}_6\text{D}_6$  at RT.

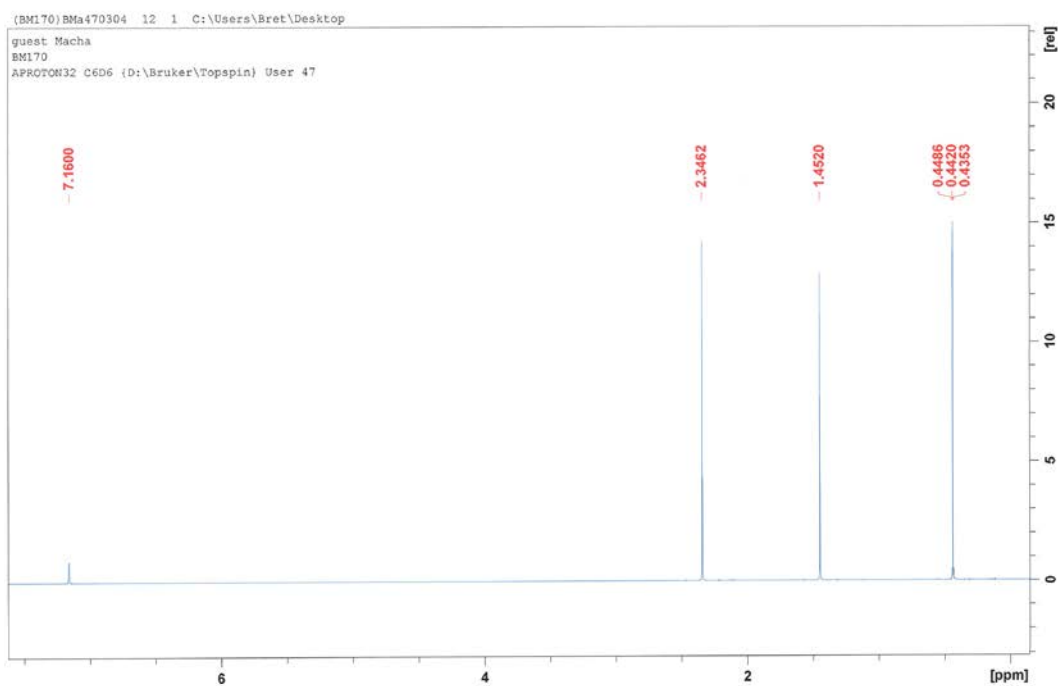

Fig. S22.  $^1\text{H}$  NMR spectrum of **5** in  $\text{C}_6\text{D}_6$  at RT.

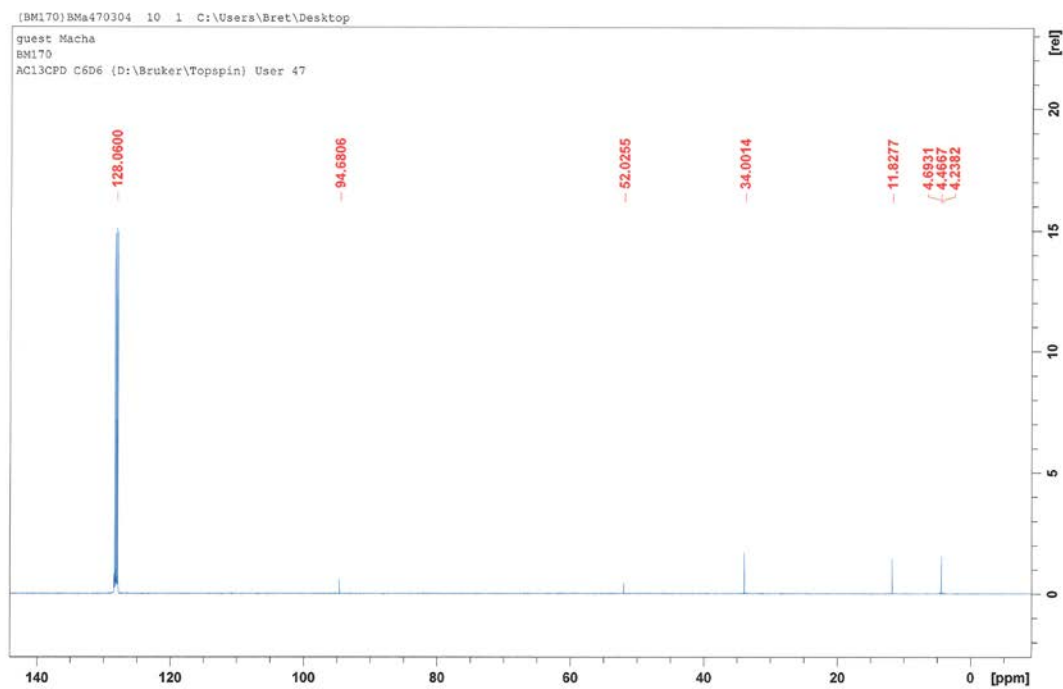

**Fig. S23.**  $^{13}\text{C}\{^1\text{H}\}$  NMR spectrum of **5** in  $\text{C}_6\text{D}_6$  at RT.

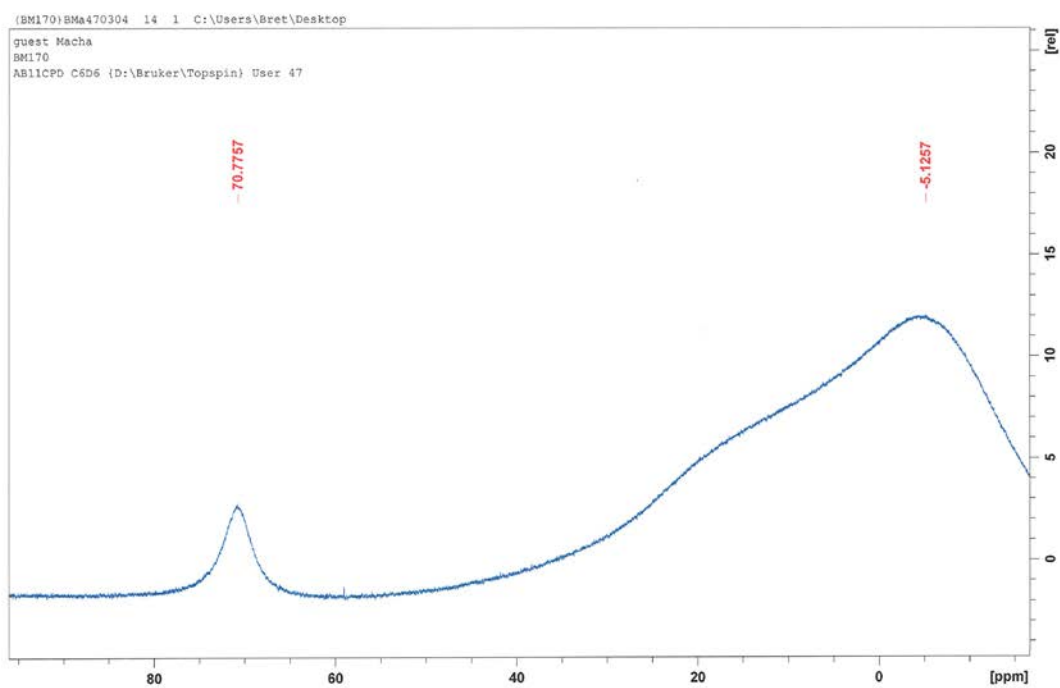

**Fig. S24.**  $^{11}\text{B}\{^1\text{H}\}$  NMR spectrum of **5** in  $\text{C}_6\text{D}_6$  at RT.

## References

1. J. M. Maher, R. P. Beatty and N. J. Cooper, *Organometallics*, 1985, **4**, 1354–1361.
2. P. McArdle and A. R. Manning, *J. Chem. Soc. A*, 1971, 717–719.
3. a) W. P. Weiner and R. G. Bergman, *J. Am. Chem. Soc.*, 1983, **105**, 3922–3929; b) M. D. Rausch and R. A. Genetti, *J. Org. Chem.*, 1970, **35**, 3888–3897.
4. R. G. Ball, W. A. G. Graham, D. M. Heinekey, J. K. Hoyano, A. D. McMaster, B. M. Mattson and S. T. Michel, *Inorg. Chem.*, 1990, **29**, 2023–2025;
5. D. A. Gaul, O. Just and W. S. Rees, *Inorg. Chem.*, 2000, **39**, 5648–5654.
6. H. Staub, R. Guillet-Nicolas, N. Even, L. Kayser, F. Kleitz and F.-G. Fontaine, *Chem. Eur. J.*, 2011, **17**, 4254–4265.
7. G. Sheldrick, *Acta Cryst.*, 2015, **A71**, 3–8.
8. G. Sheldrick, *Acta Cryst.*, 2008, **A64**, 112–122.
